# Supplementary material for: O,N-Heterocyclic germylenes as efficient catalysts for hydroboration and cyanosilylation of benzaldehyde
Source: Royal Society of Chemistry journal article supplement (doi:10.1039/d1nj01644j), 2021-01-01

Supporting Information

O,N-HETEROCYCLIC GERMYLENES AS EFFICIENT CATALYSTS FOR  
HYDROBORATION AND CYANOSILYLATION OF BENZALDEHYDE.

Kseniya V. Arsenyeva<sup>a</sup>, Kira I. Pashanova<sup>a</sup>, Olesya Yu. Trofimova<sup>a</sup>, Irina V. Ershova<sup>a</sup>,  
Maxim G. Chegrev<sup>b</sup>, Alyona A. Starikova<sup>b</sup>, Anton V. Cherkasov<sup>a</sup>, Mikhail A. Syroeshkin<sup>c</sup>, Anna  
Ya. Kozmenkova<sup>c</sup>, Alexandr V. Piskunov<sup>\*a</sup>

<sup>a</sup> G. A. Razuvaev Institute of Organometallic Chemistry of Russian Academy of Sciences,  
603950, 49 Tropinina str., Nizhny Novgorod, Russian Federation, Fax: +7 831 4627497.

<sup>b</sup> Institute of Physical and Organic Chemistry at Southern Federal University, Stachka Avenue  
194/2, 344090, Rostov-on-Don, Russian Federation

<sup>c</sup> N. D. Zelinsky Institute of Organic Chemistry of Russian Academy of Sciences, 119991  
Leninsky prosp. 47, Moscow, Russian Federation

\*Corresponding author e-mail: [pial@iomc.ras.ru](mailto:pial@iomc.ras.ru)

## Table of contents

|                                                                                                                                                                                                                                                                                                                                          |    |
|------------------------------------------------------------------------------------------------------------------------------------------------------------------------------------------------------------------------------------------------------------------------------------------------------------------------------------------|----|
| Scheme S1. Catalytic cycle and proposed mechanism for hydroboration of benzaldehyde using two molecules of 1 as catalysts. The DFT B3LYP/def2svp and CAM-B3LYP/def2svp (SMD, solvent – benzene) calculated relative enthalpies ( $\Delta H^{298}$ , kcal/mol) of the intermediates and TS are shown in blue and green, respectively..... | 5  |
| Table S1.....                                                                                                                                                                                                                                                                                                                            | 6  |
| Figure S1. Optimized geometries of reaction intermediates and transition state for cyanosilylation of benzaldehyde with 1 as catalyst calculated by the DFT B3LYP/def2svp (SMD, solvent – benzene) method. .                                                                                                                             | 7  |
| Figure S2. Energy profile of cyanosilylation of benzaldehyde catalyzed by 1, in accordance with path found by the DFT B3LYP/def2svp (SMD, solvent – benzene) method. ....                                                                                                                                                                | 8  |
| Table S2.....                                                                                                                                                                                                                                                                                                                            | 9  |
| Figure S3. DFT B3LYP/def2svp (SMD, solvent – benzene) computational results on cyanosilylation and hydroboration of benzaldehyde. ....                                                                                                                                                                                                   | 10 |
| Table S3.....                                                                                                                                                                                                                                                                                                                            | 11 |
| Figure S4. Optimized geometries of reaction intermediates and transition state for hydroboration of benzaldehyde with 1 as catalyst calculated by the DFT B3LYP/def2svp (SMD, solvent – benzene) method. ....                                                                                                                            | 12 |
| Figure S5. Energy profile of hydroboration of benzaldehyde catalyzed by 1, in accordance with path 1 found by the DFT B3LYP/def2svp (SMD, solvent – benzene) method. ....                                                                                                                                                                | 13 |
| Figure S6. Optimized geometries of reaction intermediates and transition state for hydroboration of benzaldehyde with 1 as catalyst calculated by the DFT B3LYP/def2svp (SMD, solvent – benzene) method. ....                                                                                                                            | 14 |
| Figure S7. Energy profile of hydroboration of benzaldehyde catalyzed by 1, in accordance with path 2 found by the DFT B3LYP/def2svp (SMD, solvent – benzene) method. ....                                                                                                                                                                | 15 |
| Figure S8. Optimized geometries of reaction intermediates and transition state for hydroboration of benzaldehyde with 1 as catalyst calculated by the DFT B3LYP/def2svp (SMD, solvent – benzene) method. ....                                                                                                                            | 16 |
| Figure S9. Energy profile of hydroboration of benzaldehyde catalyzed by 1, in accordance with path 3 found by the DFT B3LYP/def2svp (SMD, solvent – benzene) method. ....                                                                                                                                                                | 17 |
| Table S4.....                                                                                                                                                                                                                                                                                                                            | 17 |
| Figure S10. Optimized geometries of reaction intermediates and transition state for oxidative addition of HBpin to 1 calculated by the DFT B3LYP/def2svp (SMD, solvent – benzene) method. ....                                                                                                                                           | 18 |
| Figure S11. $^1\text{H}$ NMR spectra of $^{Ad}\text{APGe}$ (1) in benzene- $d_6$ . (*) indicates signals of Hexane.....                                                                                                                                                                                                                  | 19 |
| Figure S12. $^{13}\text{C}$ NMR spectra of $^{Ad}\text{APGe}$ (1) in benzene- $d_6$ .....                                                                                                                                                                                                                                                | 19 |
| Figure S13. $^1\text{H}$ NMR spectra for Hydroboration of $\text{C}_6\text{H}_5\text{CHO}$ with HBpin in absence of catalyst in benzene- $d_6$ .....                                                                                                                                                                                     | 20 |
| Figure S14. $^1\text{H}$ NMR spectra for Cyanosilylation of $\text{C}_6\text{H}_5\text{CHO}$ with HBpin in absence of catalyst in benzene- $d_6$ .....                                                                                                                                                                                   | 20 |
| Figure S15. $^1\text{H}$ NMR spectra for Hydroboration of $\text{C}_6\text{H}_5\text{CHO}$ with HBpin in benzene- $d_6$ using catalyst (3) loading of 1 mol% for 1 hrs at room temperature.....                                                                                                                                          | 21 |

|                                                                                                                                                                                                                  |    |
|------------------------------------------------------------------------------------------------------------------------------------------------------------------------------------------------------------------|----|
| Figure S16. <sup>1</sup> H NMR spectra for Hydroboration of C <sub>6</sub> H <sub>5</sub> CHO with HBpin in benzene-d <sub>6</sub> using catalyst (3) loading of 1 mol% for 3 hrs at room temperature. ....      | 21 |
| Figure S17. <sup>1</sup> H NMR spectra for Hydroboration of C <sub>6</sub> H <sub>5</sub> CHO with HBpin in benzene-d <sub>6</sub> using catalyst (2) loading of 1 mol% for 1 hrs at room temperature. ....      | 22 |
| Figure S18. <sup>1</sup> H NMR spectra for Hydroboration of C <sub>6</sub> H <sub>5</sub> CHO with HBpin in benzene-d <sub>6</sub> using catalyst (2) loading of 1 mol% for 3 hrs at room temperature. ....      | 22 |
| Figure S19. <sup>1</sup> H NMR spectra for Hydroboration of C <sub>6</sub> H <sub>5</sub> CHO with HBpin in benzene-d <sub>6</sub> using catalyst (1) loading of 1 mol% for 1 hrs at room temperature. ....      | 23 |
| Figure S20. <sup>1</sup> H NMR spectra for Hydroboration of C <sub>6</sub> H <sub>5</sub> CHO with HBpin in benzene-d <sub>6</sub> using catalyst (1) loading of 1 mol% for 3 hrs at room temperature. ....      | 23 |
| Figure S21. <sup>1</sup> H NMR spectra for Hydroboration of C <sub>6</sub> H <sub>5</sub> CHO with HBpin in benzene-d <sub>6</sub> using catalyst (1) loading of 0.5 mol% for 1 hrs at room temperature. ....    | 24 |
| Figure S22. <sup>1</sup> H NMR spectra for Hydroboration of C <sub>6</sub> H <sub>5</sub> CHO with HBpin in benzene-d <sub>6</sub> using catalyst (1) loading of 0.5 mol% for 3 hrs at room temperature. ....    | 24 |
| Figure S23. <sup>1</sup> H NMR spectra for Cyanosilylation of C <sub>6</sub> H <sub>5</sub> CHO with TMSCN in benzene-d <sub>6</sub> using catalyst (1) loading of 1 mol% for 1 hrs at room temperature. ....    | 25 |
| Figure S24. <sup>1</sup> H NMR spectra for Cyanosilylation of C <sub>6</sub> H <sub>5</sub> CHO with TMSCN in benzene-d <sub>6</sub> using catalyst (1) loading of 1 mol% for 3 hrs at room temperature. ....    | 25 |
| Figure S25. <sup>1</sup> H NMR spectra for Cyanosilylation of C <sub>6</sub> H <sub>5</sub> CHO with TMSCN in benzene-d <sub>6</sub> using catalyst (1) loading of 0.25 mol% for 1 hrs at room temperature. .... | 26 |
| Figure S26. <sup>1</sup> H NMR spectra for Cyanosilylation of C <sub>6</sub> H <sub>5</sub> CHO with TMSCN in benzene-d <sub>6</sub> using catalyst (1) loading of 0.25 mol% for 3 hrs at room temperature. .... | 26 |
| Figure S27. <sup>1</sup> H NMR spectra for Hydroboration of 4-Nitrobenzaldehyde with HBPin in benzene-d <sub>6</sub> using catalyst (1) loading of 1 mol% for 1 hrs at room temperature. ....                    | 27 |
| Figure S28. <sup>1</sup> H NMR spectra for Hydroboration of 4-Nitrobenzaldehyde with HBPin in benzene-d <sub>6</sub> using catalyst (1) loading of 1 mol% for 3 hrs at room temperature. ....                    | 27 |
| Figure S29. <sup>1</sup> H NMR spectra for Hydroboration of 3-Nitrobenzaldehyde with HBPin in benzene-d <sub>6</sub> using catalyst (1) loading of 1 mol% for 1 hrs at room temperature. ....                    | 28 |
| Figure S30. <sup>1</sup> H NMR spectra for Hydroboration of 3-Nitrobenzaldehyde with HBPin in benzene-d <sub>6</sub> using catalyst (1) loading of 1 mol% for 3 hrs at room temperature. ....                    | 28 |
| Figure S31. <sup>1</sup> H NMR spectra for Hydroboration of 2-Nitrobenzaldehyde with HBPin in benzene-d <sub>6</sub> using catalyst (1) loading of 1 mol% for 1 hrs at room temperature. ....                    | 29 |
| Figure S32. <sup>1</sup> H NMR spectra for Hydroboration of 2-Nitrobenzaldehyde with HBPin in benzene-d <sub>6</sub> using catalyst (1) loading of 1 mol% for 3 hrs at room temperature. ....                    | 29 |
| Figure S33. <sup>1</sup> H NMR spectra for Hydroboration of 3,4-Dichlorobenzaldehyde with HBPin in benzene-d <sub>6</sub> using catalyst (1) loading of 1 mol% for 1 hrs at room temperature. ....               | 30 |
| Figure S34. <sup>1</sup> H NMR spectra for Hydroboration of 3,4-Dichlorobenzaldehyde with HBPin in benzene-d <sub>6</sub> using catalyst (1) loading of 1 mol% for 3 hrs at room temperature. ....               | 30 |
| Figure S35. <sup>1</sup> H NMR spectra for Hydroboration of 4-Methylbenzaldehyde with HBPin in benzene-d <sub>6</sub> using catalyst (1) loading of 1 mol% for 1 hrs at room temperature. ....                   | 31 |

|                                                                                                                                                                                                         |    |
|---------------------------------------------------------------------------------------------------------------------------------------------------------------------------------------------------------|----|
| Figure S36. <sup>1</sup> H NMR spectra for Hydroboration of 4-Methylbenzaldehyde with HBPIn in benzene-d <sub>6</sub> using catalyst (1) loading of 1 mol% for 3 hrs at room temperature. ....          | 31 |
| Figure S37. <sup>1</sup> H NMR spectra for Hydroboration of 4-Methoxybenzaldehyde with HBPIn in benzene-d <sub>6</sub> using catalyst (1) loading of 1 mol% for 1 hrs at room temperature. ....         | 32 |
| Figure S38. <sup>1</sup> H NMR spectra for Hydroboration of 4-Methoxybenzaldehyde with HBPIn in benzene-d <sub>6</sub> using catalyst (1) loading of 1 mol% for 3 hrs at room temperature. ....         | 32 |
| Figure S39. <sup>1</sup> H NMR spectra for Hydroboration of 4-(dimethylamino)benzaldehyde with HBPIn in benzene-d <sub>6</sub> using catalyst (1) loading of 1 mol% for 1 hrs at room temperature. .... | 33 |
| Figure S40. <sup>1</sup> H NMR spectra for Hydroboration of 4-(dimethylamino)benzaldehyde with HBPIn in benzene-d <sub>6</sub> using catalyst (1) loading of 1 mol% for 3 hrs at room temperature. .... | 33 |
| Figure S41. <sup>1</sup> H NMR spectra for Hydroboration of PhCHO with HBPIn in benzene-d <sub>6</sub> using catalyst (1) loading of 1 mol% for 1-3 hrs at room temperature. ....                       | 34 |
| NMR spectra of pure products. ....                                                                                                                                                                      | 34 |
| Figure S42. Spin density distribution calculated by the DFT B3LYP/def2tzvp method for paramagnetic germylene 1a. ....                                                                                   | 36 |

**Scheme S1. Catalytic cycle and proposed mechanism for hydroboration of benzaldehyde using two molecules of **1** as catalysts.** The DFT B3LYP/def2svp and CAM-B3LYP/def2svp (SMD, solvent – benzene) calculated relative enthalpies ( $\Delta H^{298}$ , kcal/mol) of the intermediates and TS are shown in blue and green, respectively.

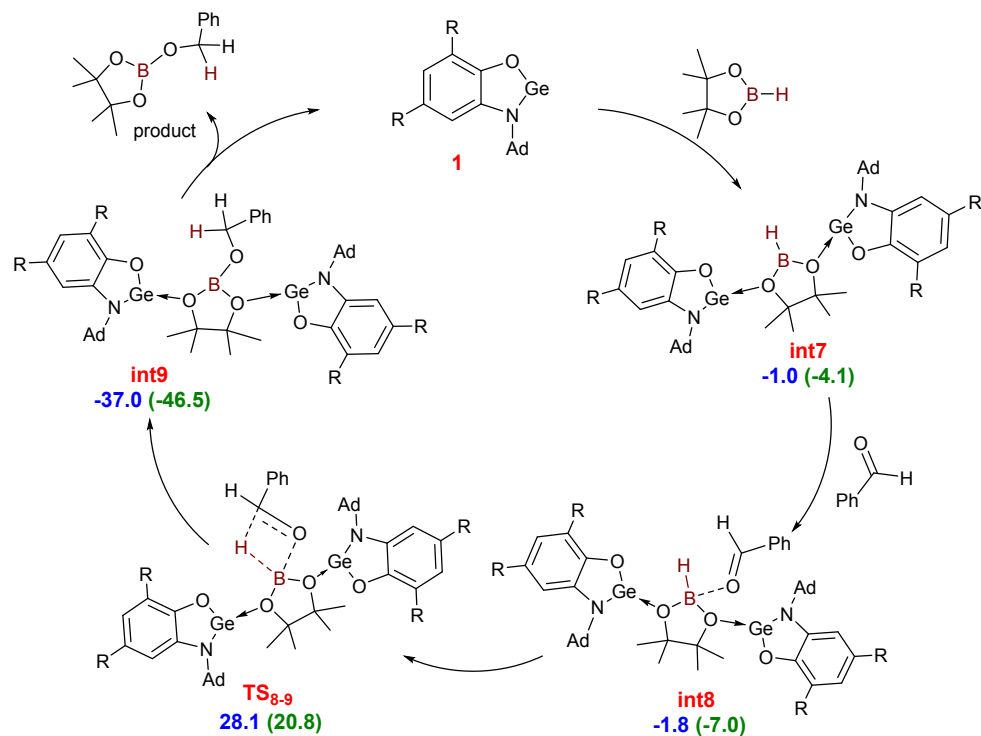

**Table S1.** Total energies without ( $E_{\text{total}}$ ), with ( $E_{\text{total}}^{\text{ZPE}}$ ) taking into account for the energies of zero-point harmonic vibrations and total enthalpies ( $H_{\text{total}}^{298}$ ), all values are given in a.u.; relative energies without ( $\Delta E$ ), with ( $\Delta E^{\text{ZPE}}$ ) taking into account for the energies of zero-point harmonic vibrations and relative enthalpies ( $\Delta H^{298}$ ), all values are given in kcal/mol, of reactants, intermediates and transition states for cyanosilylation of benzaldehyde with **1** as catalyst calculated by the DFT B3LYP/def2svp method with inclusion of nonspecific solvation (SMD, solvent – benzene). The DFT CAM-B3LYP/def2svp (SMD, solvent – benzene) data are shown in brackets.

| Structure                            | $E_{\text{total}}$             | $\Delta E$       | $E_{\text{total}}^{\text{ZPE}}$ | $\Delta E^{\text{ZPE}}$ | $H_{\text{total}}^{298}$       | $\Delta H^{298}$ |
|--------------------------------------|--------------------------------|------------------|---------------------------------|-------------------------|--------------------------------|------------------|
| <b>1</b>                             | -2906.037040<br>(-2905.659206) |                  | -2905.659724<br>(-2905.277274)  |                         | -2905.640698<br>(-2905.258513) |                  |
| TMSCN                                | -501.895293<br>(-501.752940)   |                  | -501.776491<br>(-501.632991)    |                         | -501.766081<br>(-501.622669)   |                  |
| PhCHO                                | -345.334643<br>(-345.148149)   |                  | -345.224558<br>(-345.036780)    |                         | -345.217366<br>(-345.029637)   |                  |
| PhCH(CN)OSiMe <sub>3</sub>           | -847.254612<br>(-846.934685)   |                  | -847.022382<br>(-846.699862)    |                         | -847.005016<br>(-846.682670)   |                  |
|                                      |                                |                  |                                 |                         |                                |                  |
| <b>1</b> +TMSCN+PhCHO                | -3753.266977<br>(-3752.560295) | 0.0<br>(0.0)     | -3752.660773<br>(-3751.947045)  | 0.0<br>(0.0)            | -3752.624145<br>(-3751.910819) | 0.0<br>(0.0)     |
| <b>int1</b>                          | -3407.936990<br>(-3407.419266) |                  | -3407.440458<br>(-3406.916932)  |                         | -3407.409639<br>(-3406.886523) |                  |
| <b>int1</b> +PhCHO                   | -3753.271633<br>(-3752.567415) | -2.9<br>(-4.5)   | -3752.665016<br>(-3751.953712)  | -2.7<br>(-4.2)          | -3752.627005<br>(-3751.916160) | -1.8<br>(-3.4)   |
| <b>int2</b>                          | -3753.278444<br>(-3752.577135) | -7.2<br>(-10.6)  | -3752.670697<br>(-3751.962214)  | -6.2<br>(-9.5)          | -3752.631502<br>(-3751.923571) | -4.6<br>(-8.0)   |
| <b>TS<sub>2-3</sub></b>              | -3753.227816<br>(-3752.530357) | 24.6<br>(18.8)   | -3752.619827<br>(-3751.914952)  | 25.7<br>(20.1)          | -3752.582289<br>(-3751.878099) | 26.3<br>(20.5)   |
| <b>int3</b>                          | -3753.296855<br>(-3752.601766) | -18.7<br>(-26.0) | -3752.686765<br>(-3751.984465)  | -16.3<br>(-23.5)        | -3752.649011<br>(-3751.947172) | -15.6<br>(-22.8) |
| <b>1</b> +PhCH(CN)OSiMe <sub>3</sub> | -3753.291652<br>(-3752.593891) | -15.5<br>(-21.1) | -3752.682106<br>(-3751.977136)  | -13.4<br>(-18.9)        | -3752.645714<br>(-3751.941183) | -13.5<br>(-19.1) |

**Figure S1. Optimized geometries of reaction intermediates and transition state for cyanosilylation of benzaldehyde with 1 as catalyst calculated by the DFT B3LYP/def2svp (SMD, solvent – benzene) method.** Hereinafter bond lengths are given in Å, the DFT CAM-B3LYP/def2svp (SMD, solvent – benzene) data are shown in brackets.

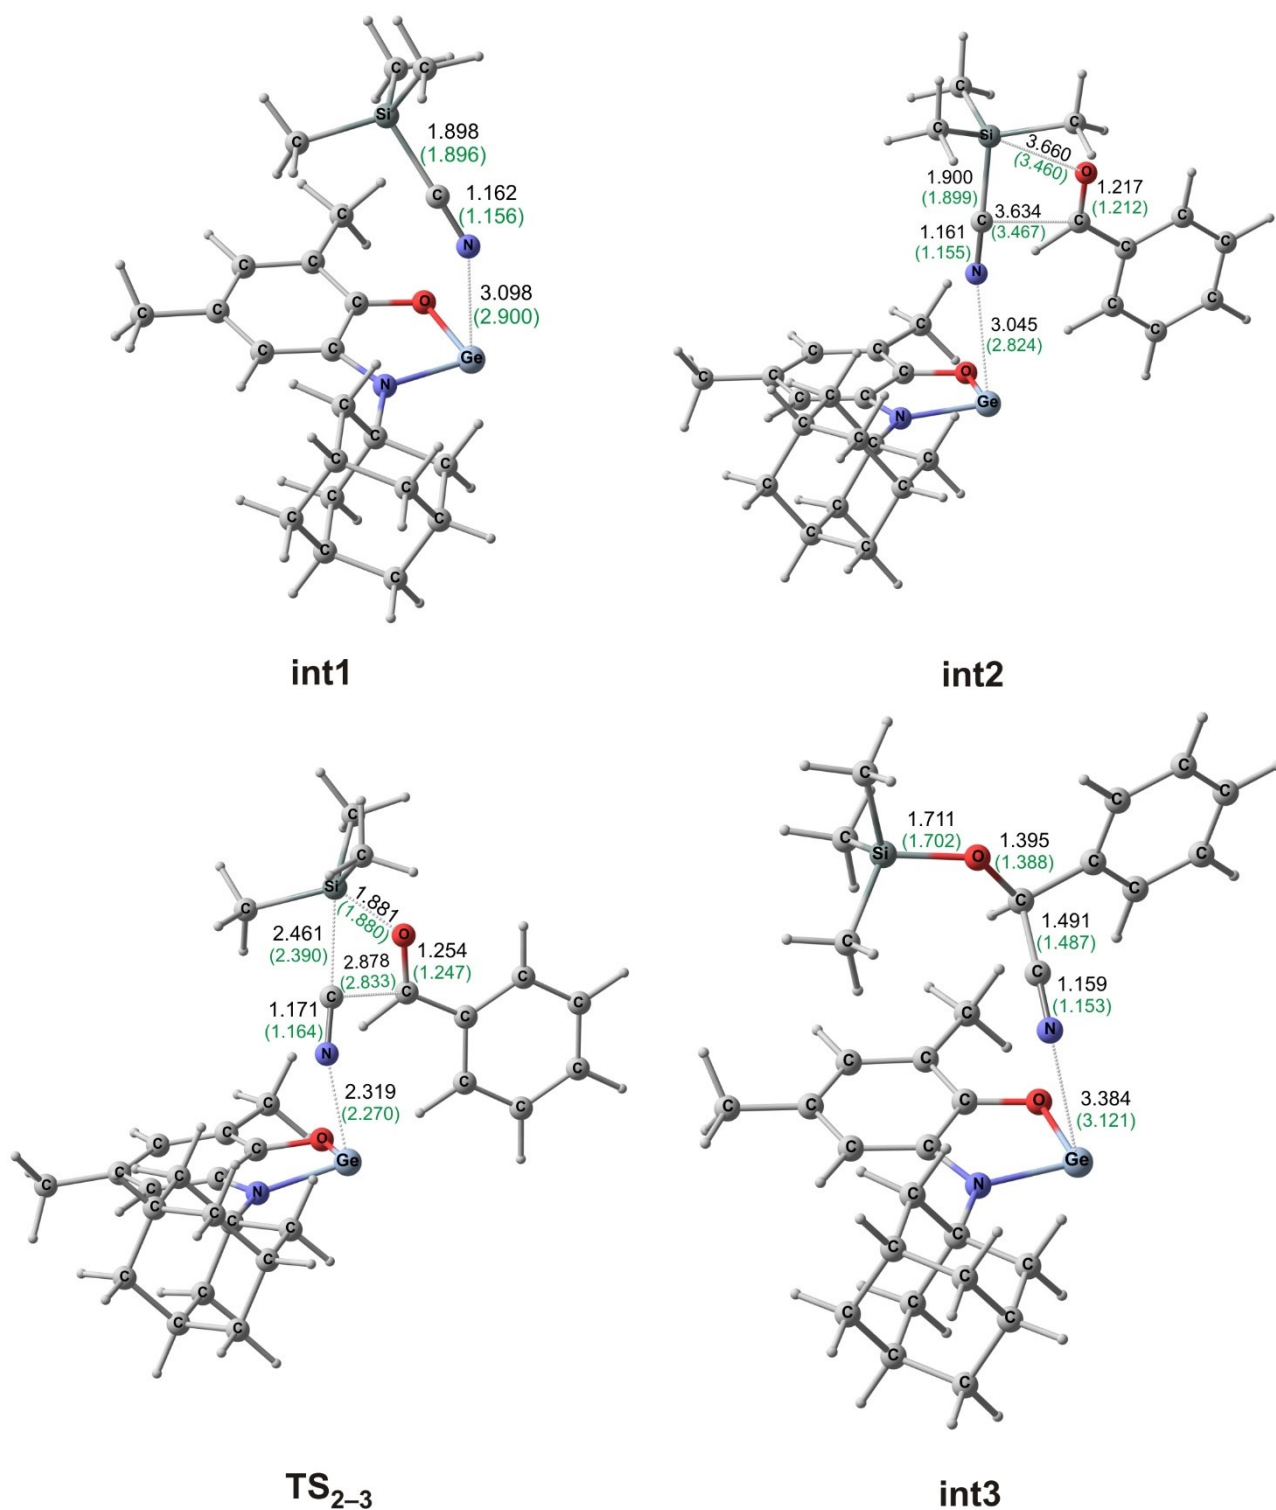

Figure S2. Energy profile of cyanosilylation of benzaldehyde catalyzed by 1, in accordance with path found by the DFT B3LYP/def2svp (SMD, solvent – benzene) method.

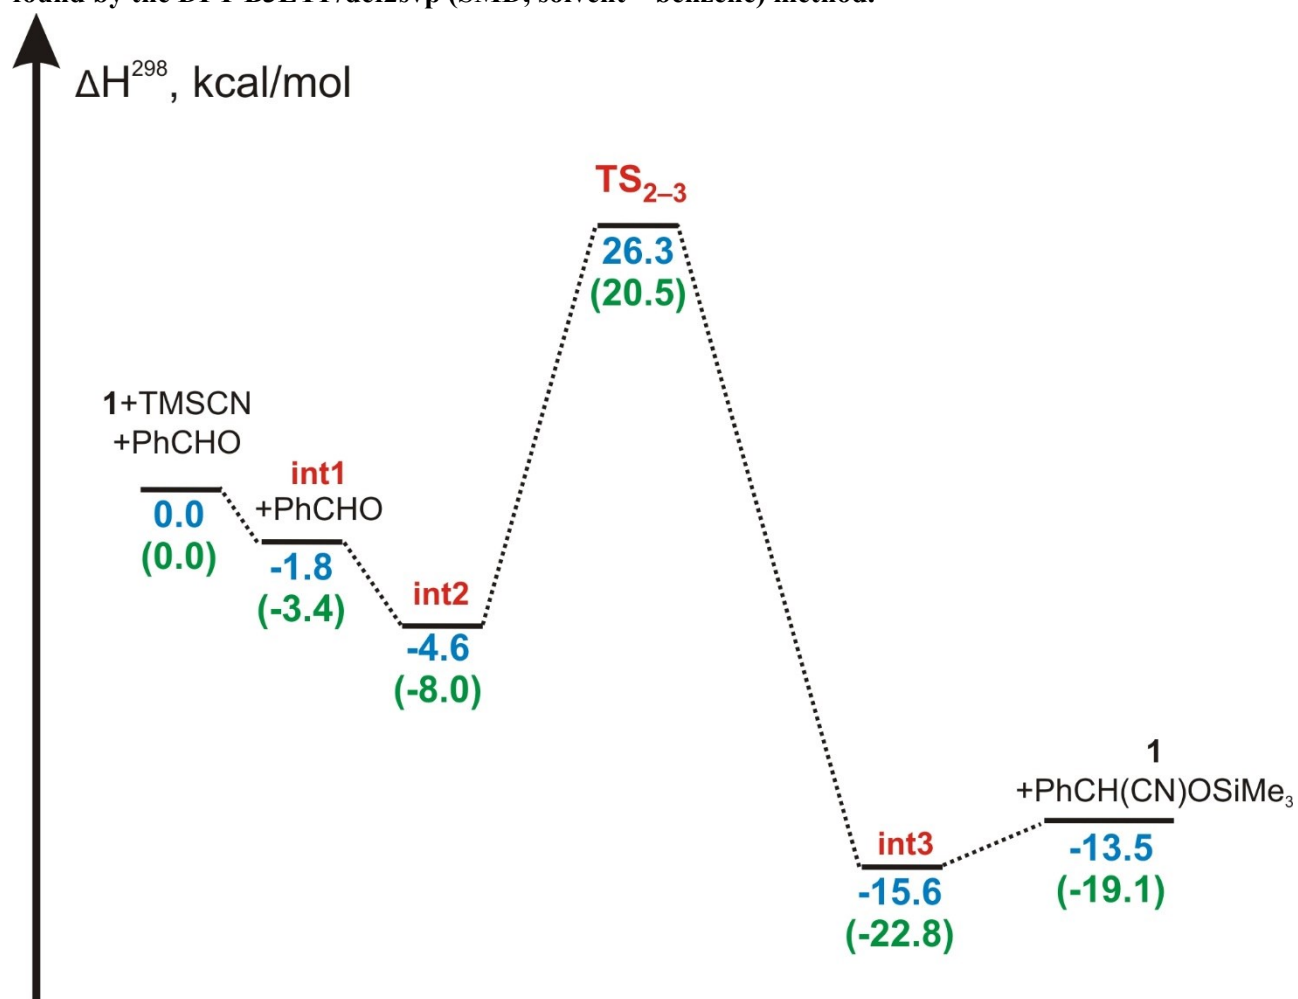



**Table S2.** Total energies without ( $E_{\text{total}}$ ), with ( $E_{\text{total}}^{\text{ZPE}}$ ) taking into account for the energies of zero-point harmonic vibrations and total enthalpies ( $H_{\text{total}}^{298}$ ), all values are given in a.u.; relative energies without ( $\Delta E$ ), with ( $\Delta E^{\text{ZPE}}$ ) taking into account for the energies of zero-point harmonic vibrations and relative enthalpies ( $\Delta H^{298}$ ), all values are given in kcal/mol, of reactants, transition states and products for cyanosilylation and hydroboration of benzaldehyde calculated by the DFT B3LYP/def2svp method with inclusion of nonspecific solvation (SMD, solvent – benzene). The DFT CAM-B3LYP/def2svp (SMD, solvent – benzene) data are shown in brackets.

| Structure                       | $E_{\text{total}}$           | $\Delta E$       | $E_{\text{total}}^{\text{ZPE}}$ | $\Delta E^{\text{ZPE}}$ | $H_{\text{total}}^{298}$     | $\Delta H^{298}$ |
|---------------------------------|------------------------------|------------------|---------------------------------|-------------------------|------------------------------|------------------|
| Cyanosilylation of benzaldehyde |                              |                  |                                 |                         |                              |                  |
| TMSCN                           | -501.895293<br>(-501.752940) |                  | -501.776491<br>(-501.632991)    |                         | -501.766081<br>(-501.622669) |                  |
| PhCHO                           | -345.334643<br>(-345.148149) |                  | -345.224558<br>(-345.036780)    |                         | -345.217366<br>(-345.029637) |                  |
| (TMSCN+PhCHO)                   | -847.235781<br>(-846.908995) | -3.7<br>(-5.0)   | -847.006082<br>(-846.676687)    | -3.2<br>(-4.3)          | -846.987174<br>(-846.658061) | -2.3<br>(-3.6)   |
| TS <sub>cyanosilylation</sub>   | -847.171811<br>(-846.846317) | 36.5<br>(34.4)   | -846.942114<br>(-846.614188)    | 37.0<br>(34.9)          | -846.924244<br>(-846.596441) | 37.2<br>(35.1)   |
| PhCH(CN)OSiMe <sub>3</sub>      | -847.254612<br>(-846.934685) | -15.5<br>(-21.1) | -847.022382<br>(-846.699862)    | -13.4<br>(-18.9)        | -847.005016<br>(-846.682670) | -13.5<br>(-19.1) |
| Hydroboration of benzaldehyde   |                              |                  |                                 |                         |                              |                  |
| HBpin                           | -411.575518<br>(-411.365462) |                  | -411.386133<br>(-411.174067)    |                         | -411.375683<br>(-411.163733) |                  |
| PhCHO                           | -345.334643<br>(-345.148149) |                  | -345.224558<br>(-345.036780)    |                         | -345.217366<br>(-345.029637) |                  |
| (HBpin+PhCHO)                   | -756.913088<br>(-756.519813) | -1.8<br>(-3.9)   | -756.612828<br>(-756.216074)    | -1.3<br>(-3.3)          | -756.593830<br>(-756.197330) | -0.5<br>(-2.5)   |
| TS <sub>hydroboration</sub>     | -756.861894<br>(-756.469329) | 30.3<br>(27.8)   | -756.562821<br>(-756.166856)    | 30.0<br>(27.6)          | -756.545563<br>(-756.149714) | 29.8<br>(27.4)   |
| PhCH <sub>2</sub> OBpin         | -756.973881<br>(-756.586327) | -40.0<br>(-45.6) | -756.669073<br>(-756.277878)    | -36.6<br>(-42.1)        | -756.652415<br>(-756.260596) | -37.3<br>(-42.2) |

Figure S3. DFT B3LYP/def2svp (SMD, solvent – benzene) computational results on cyanosilylation and hydroboration of benzaldehyde.

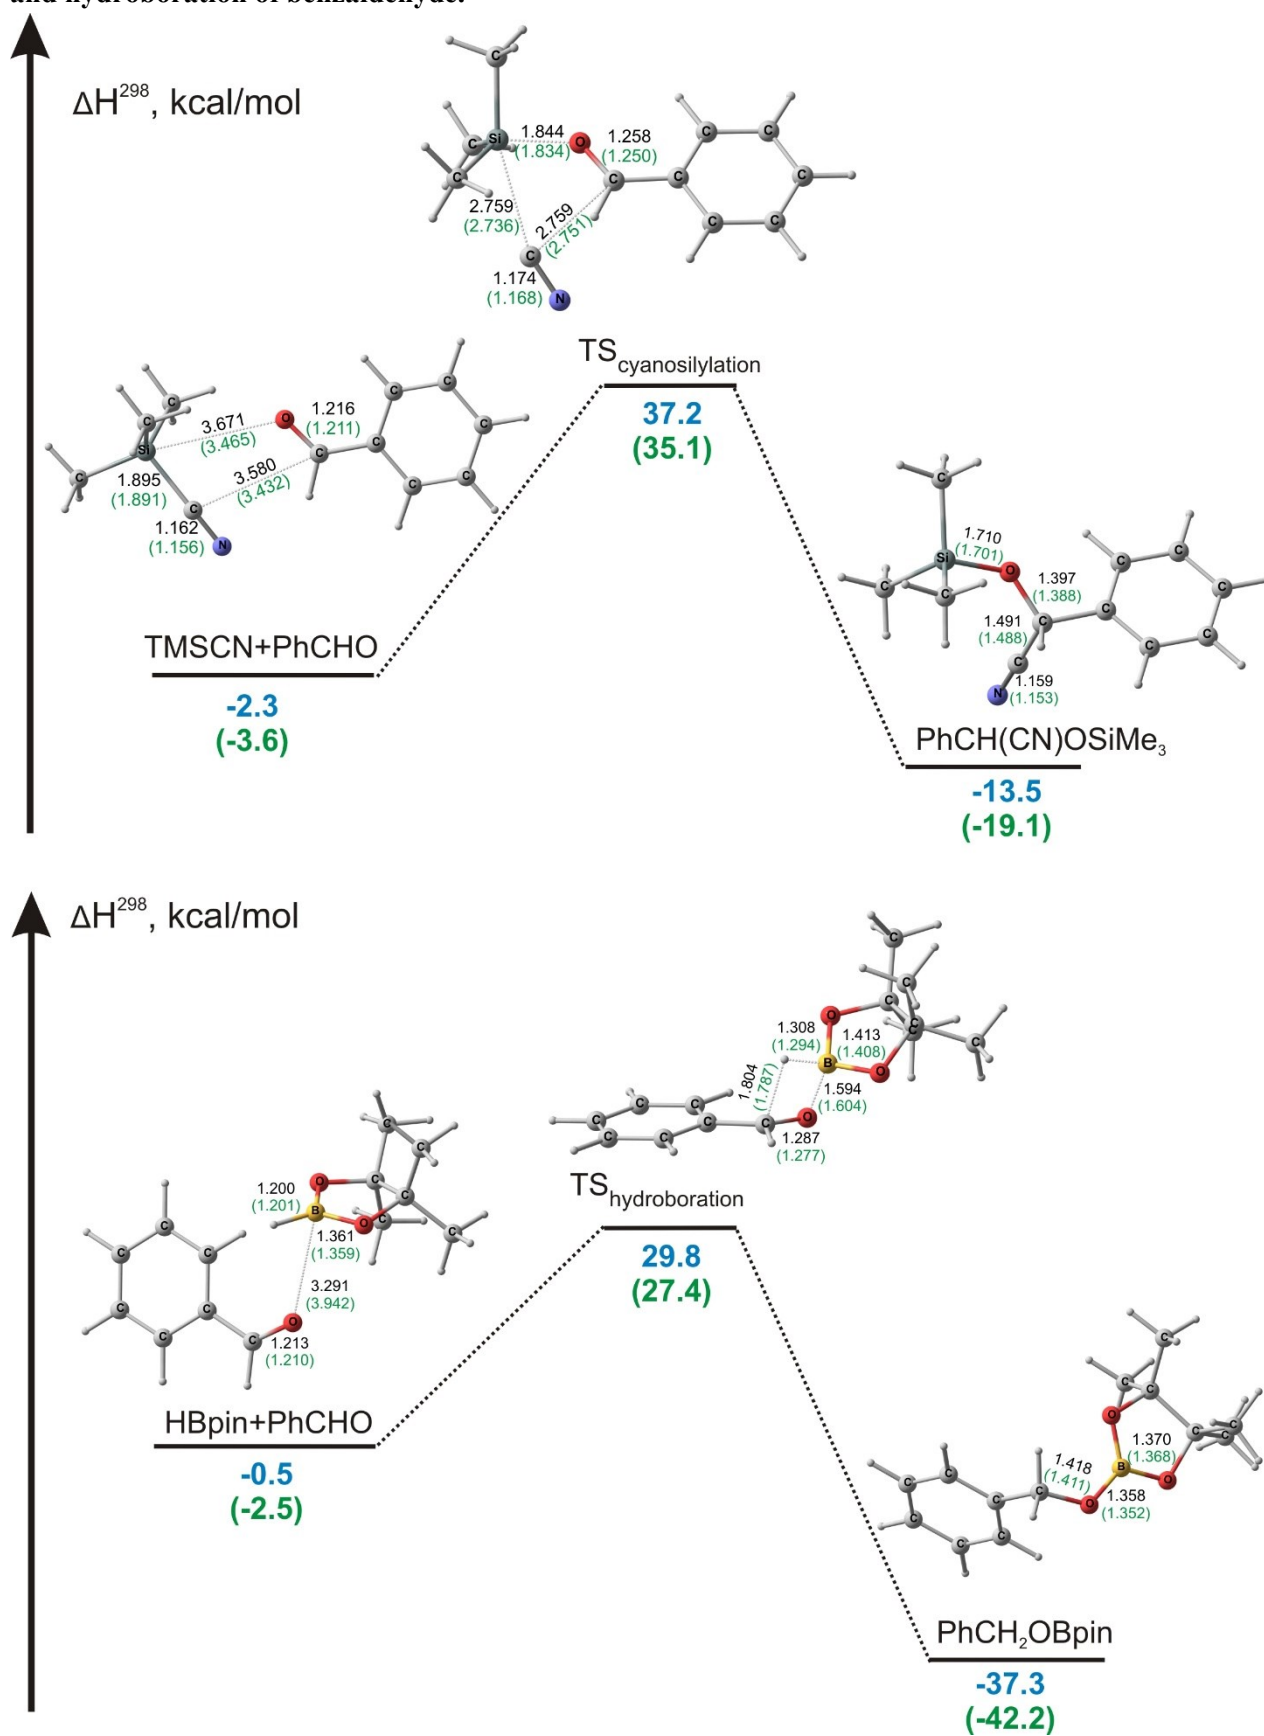

**Table S3.** Total energies without ( $E_{\text{total}}$ ), with ( $E_{\text{total}}^{\text{ZPE}}$ ) taking into account for the energies of zero-point harmonic vibrations and total enthalpies ( $H_{\text{total}}^{298}$ ), all values are given in a.u.; relative energies without ( $\Delta E$ ), with ( $\Delta E^{\text{ZPE}}$ ) taking into account for the energies of zero-point harmonic vibrations and relative enthalpies ( $\Delta H^{298}$ ), all values are given in kcal/mol, of reactants, intermediates and transition states for hydroboration of benzaldehyde with **1** as catalyst, calculated by the DFT B3LYP/def2svp method with inclusion of nonspecific solvation (SMD, solvent – benzene). The DFT CAM-B3LYP/def2svp (SMD, solvent – benzene) data are shown in brackets.

| Structure                           | $E_{\text{total}}$             | $\Delta E$       | $E_{\text{total}}^{\text{ZPE}}$ | $\Delta E^{\text{ZPE}}$ | $H_{\text{total}}^{298}$       | $\Delta H^{298}$ |
|-------------------------------------|--------------------------------|------------------|---------------------------------|-------------------------|--------------------------------|------------------|
| <b>1</b>                            | -2906.037040<br>(-2905.659206) |                  | -2905.659724<br>(-2905.277274)  |                         | -2905.640698<br>(-2905.258513) |                  |
| HBpin                               | -411.575518<br>(-411.365462)   |                  | -411.386133<br>(-411.174067)    |                         | -411.375683<br>(-411.163733)   |                  |
| PhCHO                               | -345.334643<br>(-345.148149)   |                  | -345.224558<br>(-345.036780)    |                         | -345.217366<br>(-345.029637)   |                  |
| PhCH <sub>2</sub> OBpin             | -756.973881<br>(-756.586327)   |                  | -756.669073<br>(-756.277878)    |                         | -756.652415<br>(-756.260596)   |                  |
| Path 1                              |                                |                  |                                 |                         |                                |                  |
| <b>1</b> + HBpin +PhCHO             | -3662.947202<br>(-3662.172818) | 0.0<br>(0.0)     | -3662.270415<br>(-3661.488121)  | 0.0<br>(0.0)            | -3662.233747<br>(-3661.451883) | 0.0<br>(0.0)     |
| <b>int4</b>                         | -3317.615541<br>(-3317.030072) |                  | -3317.048189<br>(-3316.456423)  |                         | -3317.017299<br>(-3316.425939) |                  |
| <b>int4</b> +PhCHO                  | -3662.950184<br>(-3662.178221) | -1.9<br>(-3.4)   | -3662.272747<br>(-3661.493203)  | -1.5<br>(-3.2)          | -3662.234665<br>(-3661.455576) | -0.6<br>(-2.3)   |
| <b>int5</b>                         | -3662.953462<br>(-3662.183385) | -3.9<br>(-6.6)   | -3662.275612<br>(-3661.497204)  | -3.3<br>(-5.7)          | -3662.237101<br>(-3661.458469) | -2.1<br>(-4.1)   |
| <b>TS<sub>5-6</sub></b>             | -3662.902698<br>(-3662.136438) | 27.9<br>(22.8)   | -3662.226063<br>(-3661.451349)  | 27.8<br>(23.1)          | -3662.188351<br>(-3661.414255) | 28.5<br>(23.6)   |
| <b>int6</b>                         | -3663.012506<br>(-3662.252742) | -41.0<br>(-50.2) | -3662.330072<br>(-3661.561984)  | -37.4<br>(-46.3)        | -3662.291853<br>(-3661.524514) | -36.5<br>(-45.6) |
| <b>1</b> + PhCH <sub>2</sub> OBpin  | -3663.010922<br>(-3662.245525) | -40.0<br>(-45.6) | -3662.328797<br>(-3661.555272)  | -36.6<br>(-42.1)        | -3662.293113<br>(-3661.519109) | -37.3<br>(-42.2) |
| Path 2                              |                                |                  |                                 |                         |                                |                  |
| <b>1+1</b> +HBpin+PhCHO             | -6568.984243<br>(-6567.832024) | 0.0<br>(0.0)     | -6567.930139<br>(-6566.765395)  | 0.0<br>(0.0)            | -6567.874445<br>(-6566.710396) | 0.0<br>(0.0)     |
| <b>int7</b>                         | -6223.655414<br>(-6222.694252) |                  | -6222.709985<br>(-6221.738137)  |                         | -6222.658719<br>(-6221.687357) |                  |
| <b>int7</b> +PhCHO                  | -6568.990057<br>(-6567.842402) | -3.6<br>(-6.5)   | -6567.934543<br>(-6566.774917)  | -2.8<br>(-6.0)          | -6567.876085<br>(-6566.716994) | -1.0<br>(-4.1)   |
| <b>int8</b>                         | -6568.993149<br>(-6567.848999) | -5.6<br>(-10.7)  | -6567.937329<br>(-6566.780557)  | -4.5<br>(-9.5)          | -6567.877314<br>(-6566.721475) | -1.8<br>(-7.0)   |
| <b>TS<sub>8-9</sub></b>             | -6568.942902<br>(-6567.802359) | 25.9<br>(18.6)   | -6567.887510<br>(-6566.734313)  | 26.8<br>(19.5)          | -6567.829617<br>(-6566.677303) | 28.1<br>(20.8)   |
| <b>int9</b>                         | -6569.052726<br>(-6567.915497) | -43.0<br>(-52.4) | -6567.992081<br>(-6566.842214)  | -38.9<br>(-48.2)        | -6567.933421<br>(-6566.784533) | -37.0<br>(-46.5) |
| <b>1+1</b> +PhCH <sub>2</sub> OBpin | -6569.047962<br>(-6567.904731) | -40.0<br>(-45.6) | -6567.988521<br>(-6566.832546)  | -36.6<br>(-42.1)        | -6567.933811<br>(-6566.777622) | -37.3<br>(-42.2) |
| Path 3                              |                                |                  |                                 |                         |                                |                  |

|                                   |                                |                  |                                |                  |                                |                  |
|-----------------------------------|--------------------------------|------------------|--------------------------------|------------------|--------------------------------|------------------|
| <b>1</b> + HBpin+PhCHO            | -3662.947202<br>(-3662.172818) | 0.0<br>(0.0)     | -3662.270415<br>(-3661.488121) | 0.0<br>(0.0)     | -3662.233747<br>(-3661.451883) | 0.0<br>(0.0)     |
| <b>int10</b>                      | -3251.376556<br>(-3250.817220) |                  | -3250.888390<br>(-3250.323213) |                  | -3250.860891<br>(-3250.296131) |                  |
| <b>int10</b> +HBpin               | -3662.952074<br>(-3662.182682) | -3.1<br>(-6.2)   | -3662.274523<br>(-3661.497280) | -2.6<br>(-5.7)   | -3662.236574<br>(-3661.459864) | -1.8<br>(-5.0)   |
| <b>int11</b>                      | -3662.954200<br>(-3662.184986) | -4.4<br>(-7.6)   | -3662.276269<br>(-3661.498777) | -3.7<br>(-6.7)   | -3662.237679<br>(-3661.459950) | -2.5<br>(-5.1)   |
| <b>TS<sub>11-12</sub></b>         | -3662.904431<br>(-3662.138437) | 26.8<br>(21.6)   | -3662.227335<br>(-3661.453417) | 27.0<br>(21.8)   | -3662.189742<br>(-3661.416240) | 27.6<br>(22.4)   |
| <b>int12</b>                      | -3663.012044<br>(-3662.252971) | -40.7<br>(-50.3) | -3662.328940<br>(-3661.561826) | -36.7<br>(-46.3) | -3662.291086<br>(-3661.524464) | -36.0<br>(-45.5) |
| <b>1</b> +PhCH <sub>2</sub> OBpin | -3663.010922<br>(-3662.245525) | -40.0<br>(-45.6) | -3662.328797<br>(-3661.555272) | -36.6<br>(-42.1) | -3662.293113<br>(-3661.519109) | -37.3<br>(-42.2) |

**Figure S4. Optimized geometries of reaction intermediates and transition state for hydroboration of benzaldehyde with 1 as catalyst calculated by the DFT B3LYP/def2svp (SMD, solvent – benzene) method.**

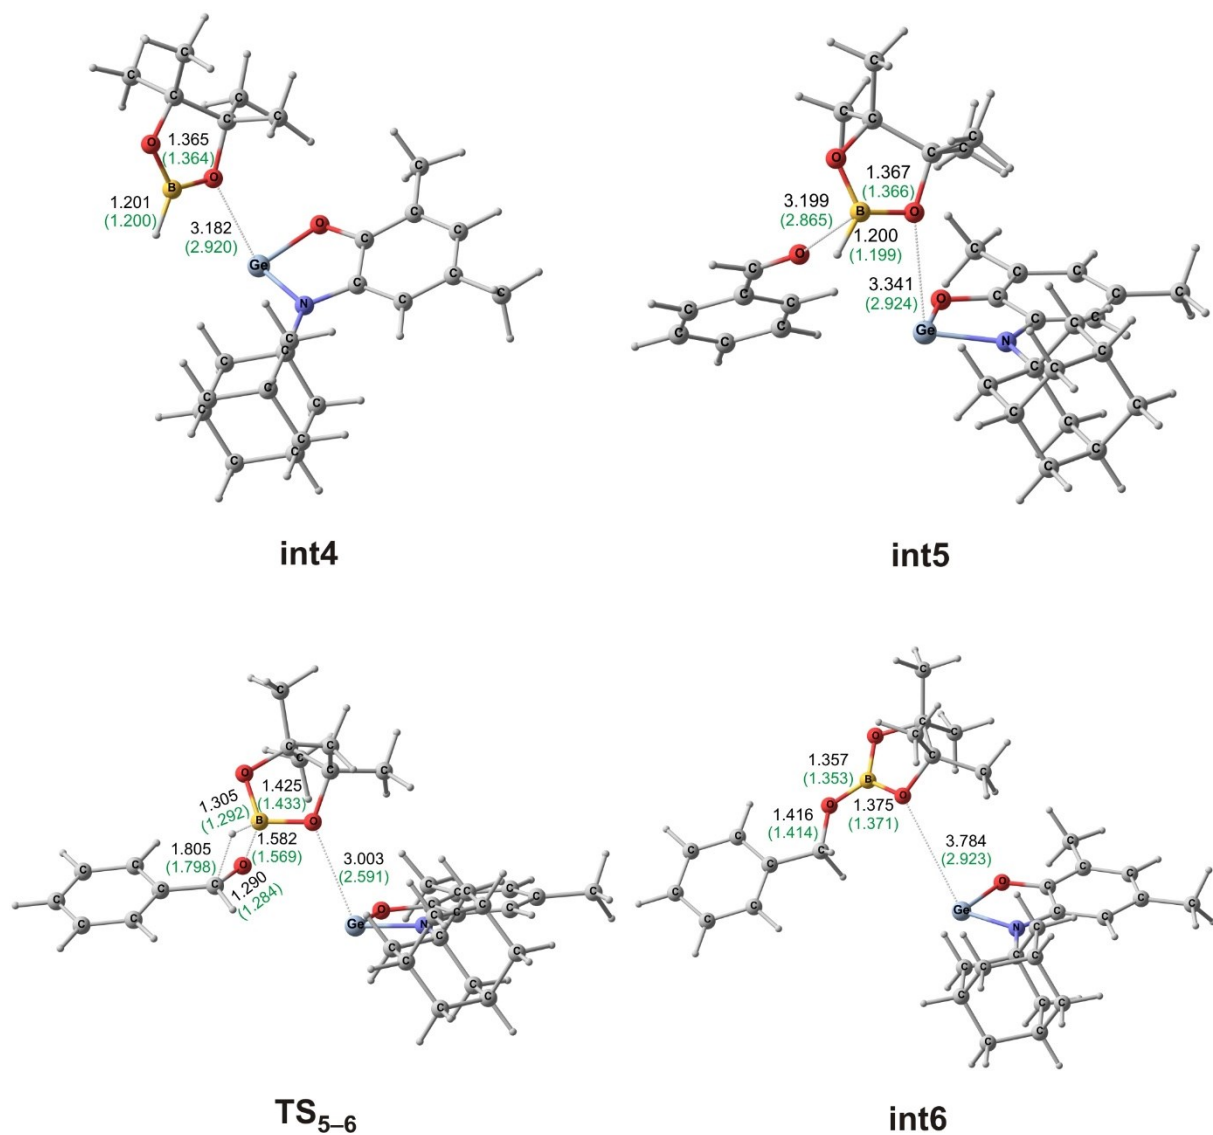

Figure S5. Energy profile of hydroboration of benzaldehyde catalyzed by 1, in accordance with path 1 found by the DFT B3LYP/def2svp (SMD, solvent – benzene) method.

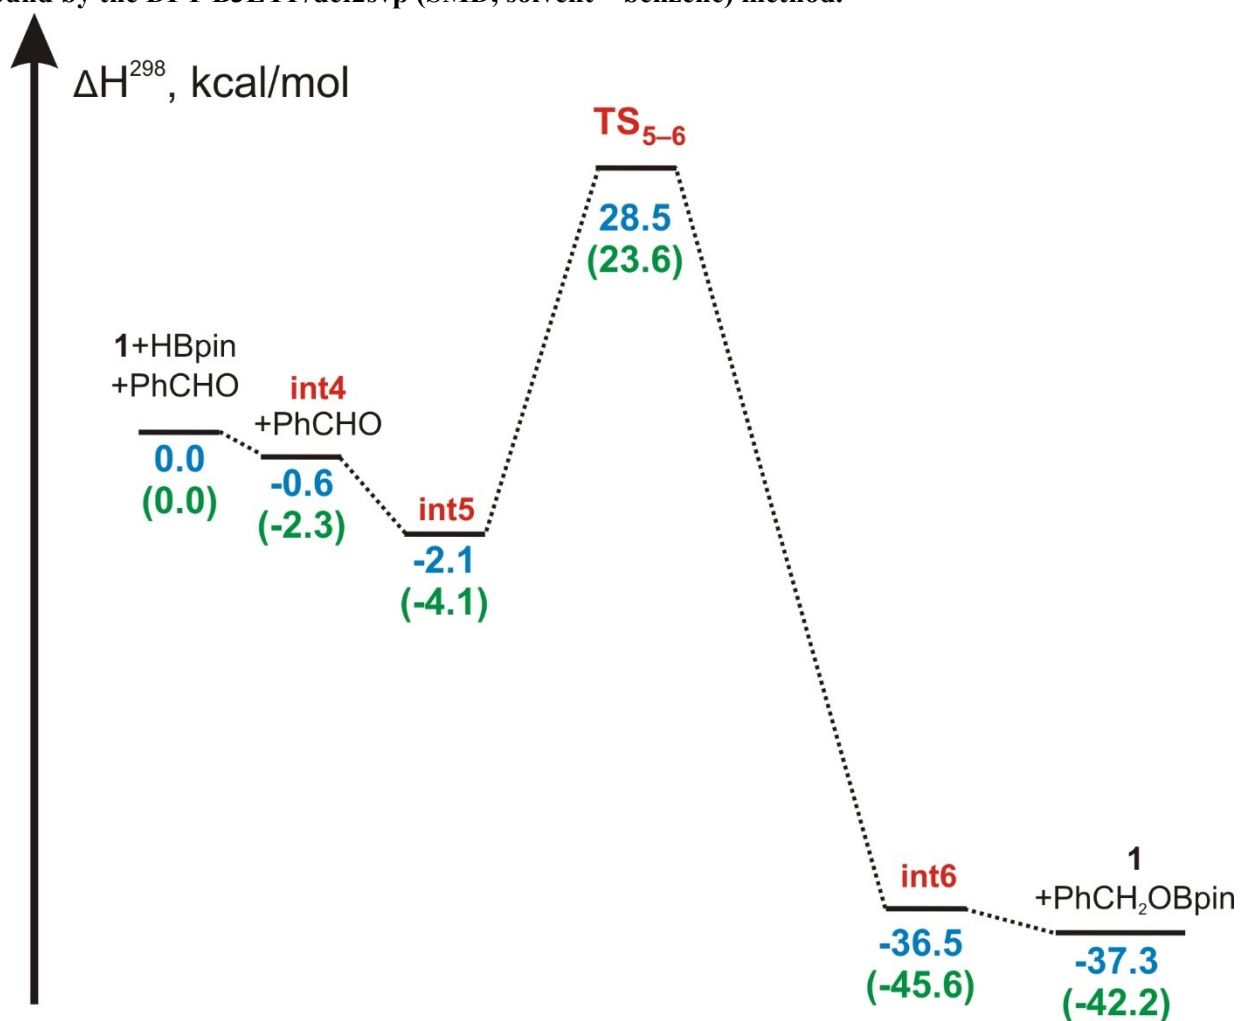

**Figure S6. Optimized geometries of reaction intermediates and transition state for hydroboration of benzaldehyde with 1 as catalyst calculated by the DFT B3LYP/def2svp (SMD, solvent – benzene) method.**

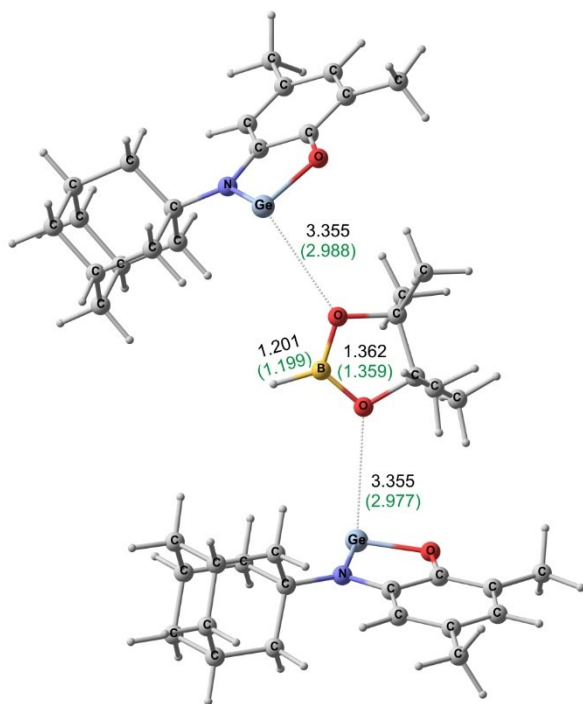

**int7**

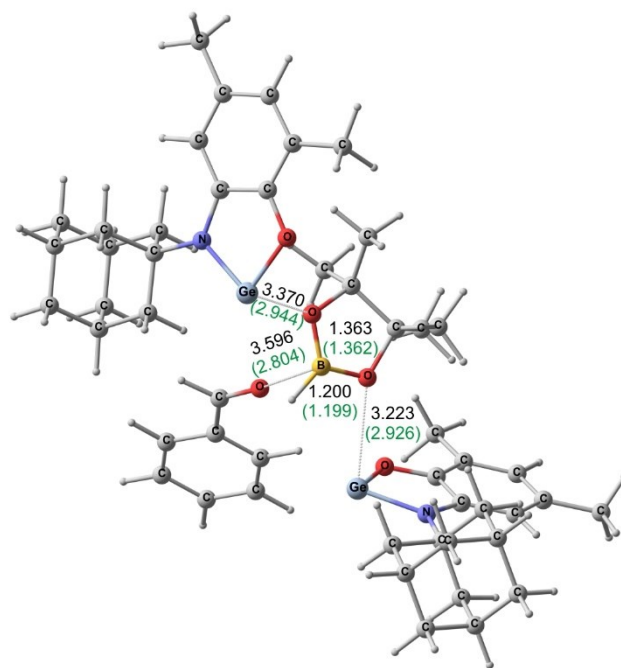

**int8**

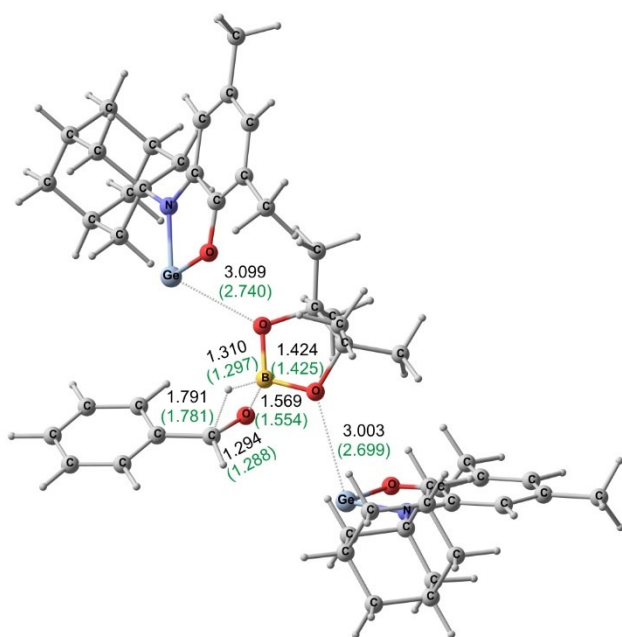

**TS<sub>8-9</sub>**

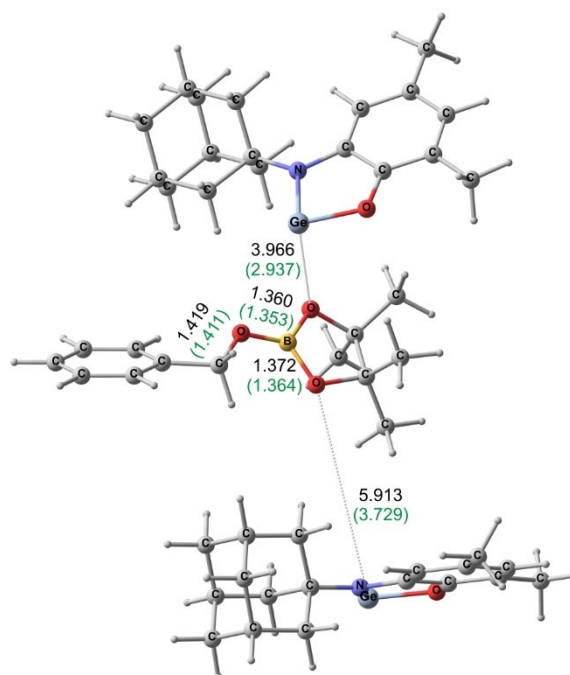

**int9**

Figure S7. Energy profile of hydroboration of benzaldehyde catalyzed by 1, in accordance with path 2 found by the DFT B3LYP/def2svp (SMD, solvent – benzene) method.

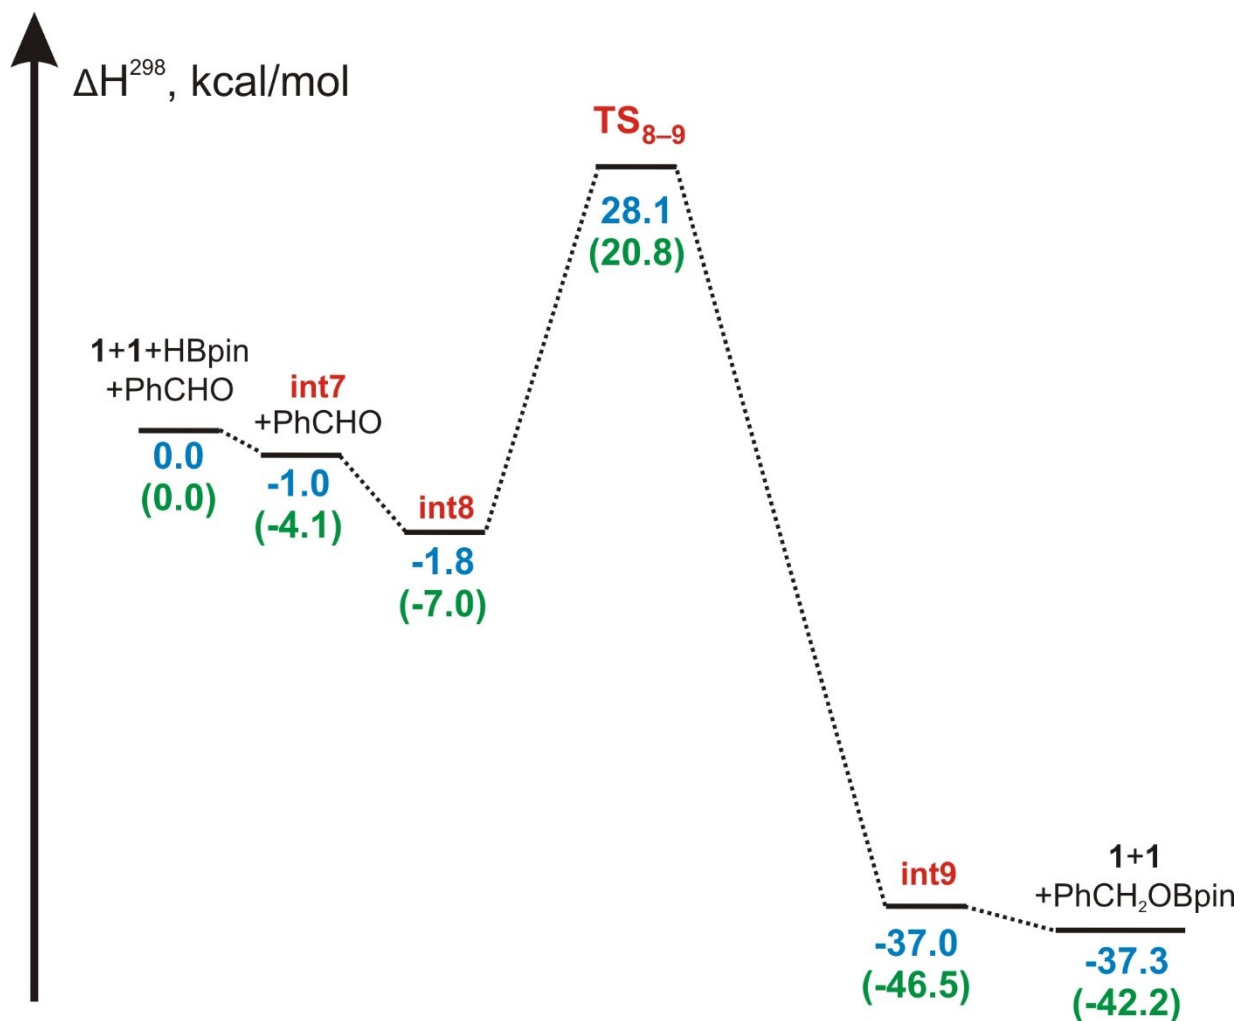

**Figure S8. Optimized geometries of reaction intermediates and transition state for hydroboration of benzaldehyde with 1 as catalyst calculated by the DFT B3LYP/def2svp (SMD, solvent – benzene) method.**

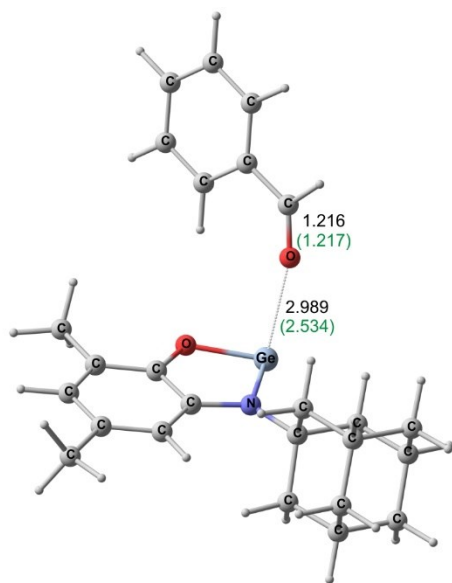

**int10**

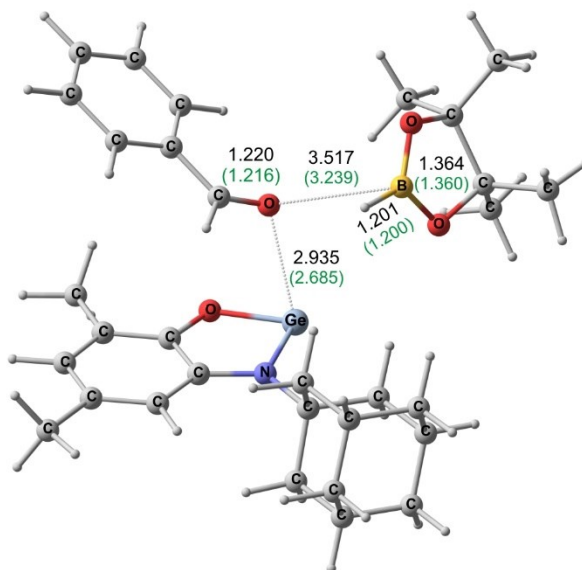

**int11**

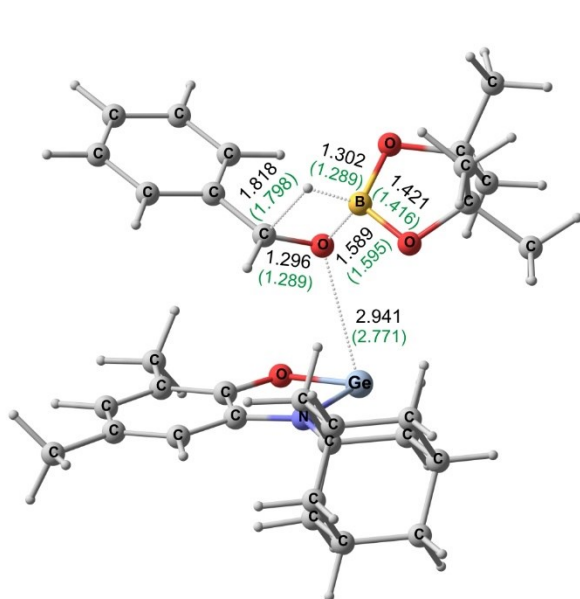

**TS<sub>11-12</sub>**

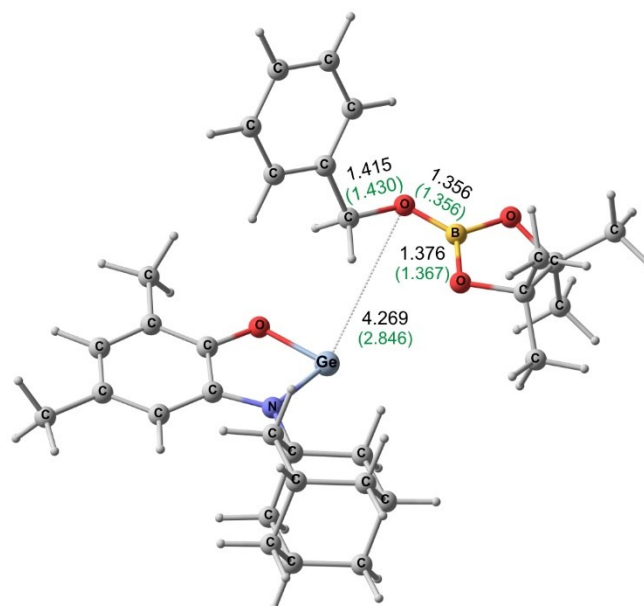

**int12**



**Figure S9.** Energy profile of hydroboration of benzaldehyde catalyzed by **1**, in accordance with path 3 found by the DFT B3LYP/def2svp (SMD, solvent – benzene) method.

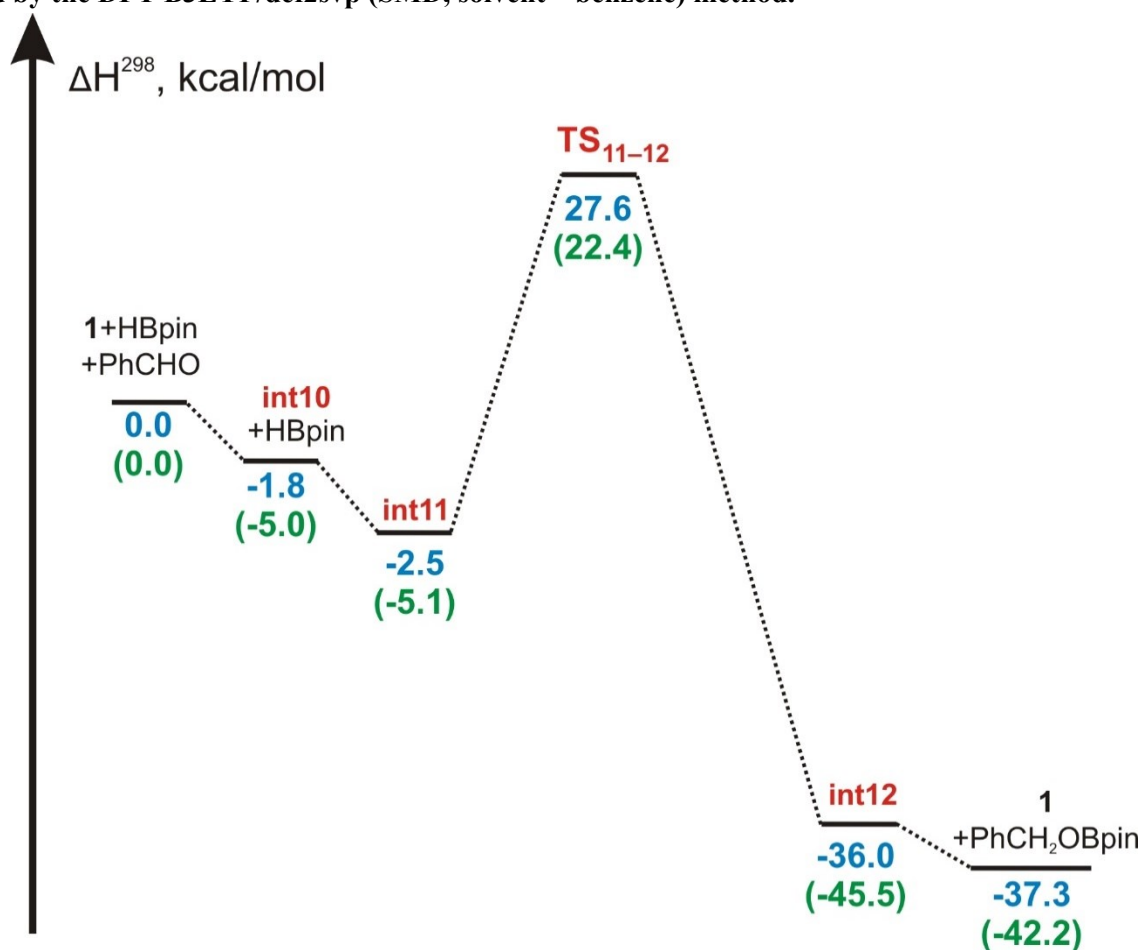

**Table S4.** Total energies without ( $E_{\text{total}}$ ), with ( $E_{\text{total}}^{\text{ZPE}}$ ) taking into account for the energies of zero-point harmonic vibrations and total enthalpies ( $H_{\text{total}}^{298}$ ), all values are given in a.u.; relative energies without ( $\Delta E$ ), with ( $\Delta E^{\text{ZPE}}$ ) taking into account for the energies of zero-point harmonic vibrations and relative enthalpies ( $\Delta H^{298}$ ), all values are given in kcal/mol, of reactant, transition state and product for oxidative addition of HBpin to **1** calculated by the DFT B3LYP/def2svp method with inclusion of nonspecific solvation (SMD, solvent – benzene). The DFT CAM-B3LYP/def2svp (SMD, solvent – benzene) data are shown in brackets.

| Structure                 | $E_{\text{total}}$             | $\Delta E$     | $E_{\text{total}}^{\text{ZPE}}$ | $\Delta E^{\text{ZPE}}$ | $H_{\text{total}}^{298}$       | $\Delta H^{298}$ |
|---------------------------|--------------------------------|----------------|---------------------------------|-------------------------|--------------------------------|------------------|
| <b>1</b> + HBpin          | -3317.612559<br>(-3317.024668) | 0.0<br>(0.0)   | -3317.045857<br>(-3316.451341)  | 0.0<br>(0.0)            | -3317.016381<br>(-3316.422246) | 0.0<br>(0.0)     |
| <b>int13</b>              | -3317.614419<br>(-3317.027876) | -1.2<br>(-2.0) | -3317.047125<br>(-3316.453982)  | -0.8<br>(-1.7)          | -3317.016189<br>(-3316.424339) | 0.0<br>(-1.3)    |
| <b>TS<sub>13-14</sub></b> | -3317.539644<br>(-3316.957748) | 45.8<br>(42.0) | -3316.976370<br>(-3316.387494)  | 43.6<br>(40.1)          | -3316.946473<br>(-3316.358043) | 43.9<br>(40.3)   |
| <b>int14</b>              | -3317.594082<br>(-3317.014944) | 11.6<br>(6.1)  | -3317.027850<br>(-3316.442096)  | 11.3<br>(5.8)           | -3316.997666<br>(-3316.412221) | 11.7<br>(6.3)    |

Figure S10. Optimized geometries of reaction intermediates and transition state for oxidative addition of HBpin to 1 calculated by the DFT B3LYP/def2svp (SMD, solvent – benzene) method.

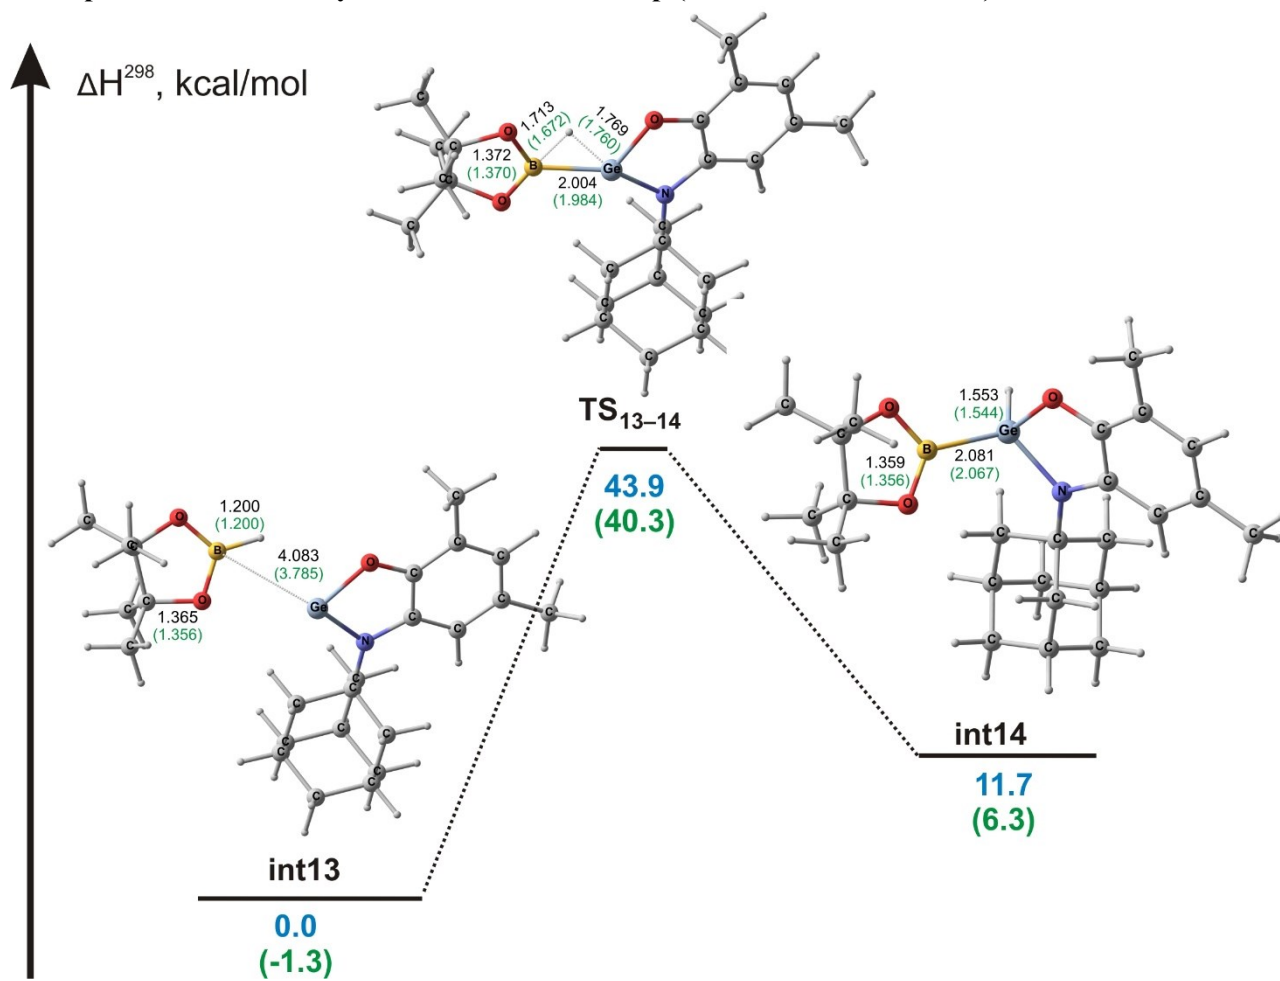

Figure S11.  $^1\text{H}$  NMR spectra of  $^{\text{Ad}}\text{APGe}$  (1) in benzene- $\text{d}_6$ . (\*) indicates signals of Hexane.

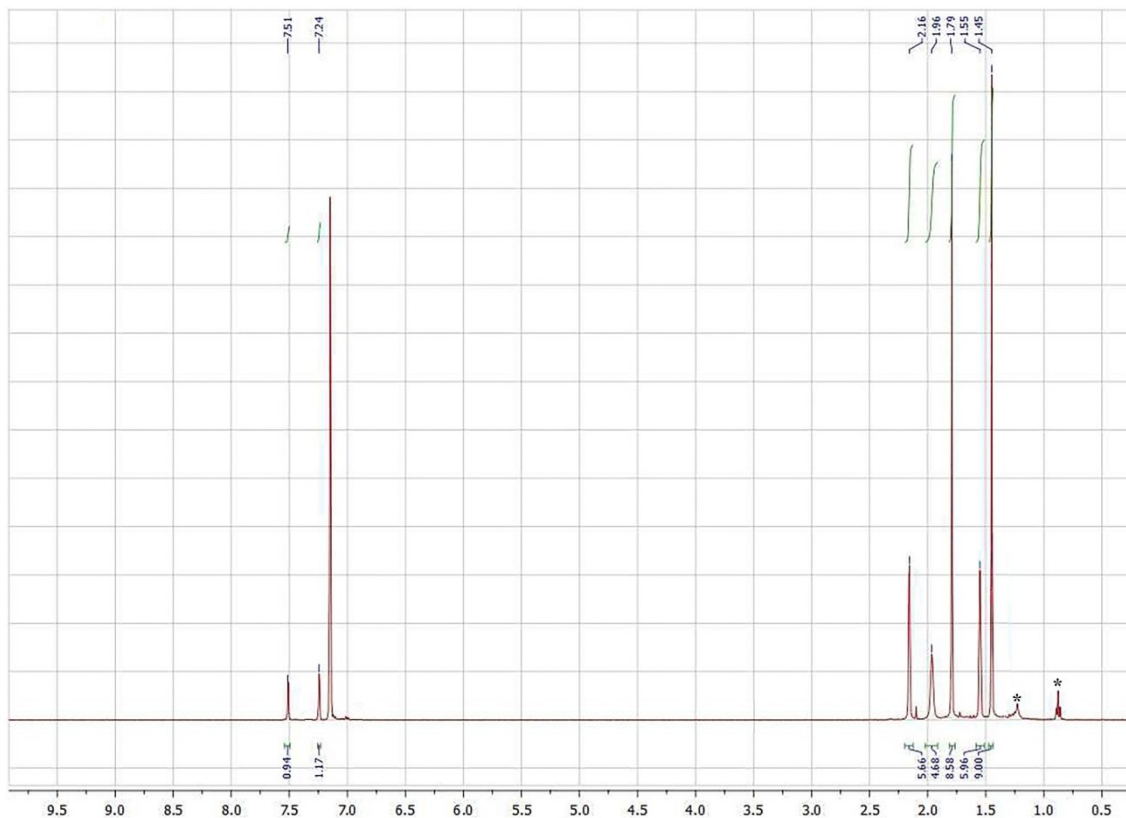

Figure S12.  $^{13}\text{C}$  NMR spectra of  $^{\text{Ad}}\text{APGe}$  (1) in benzene- $\text{d}_6$ .

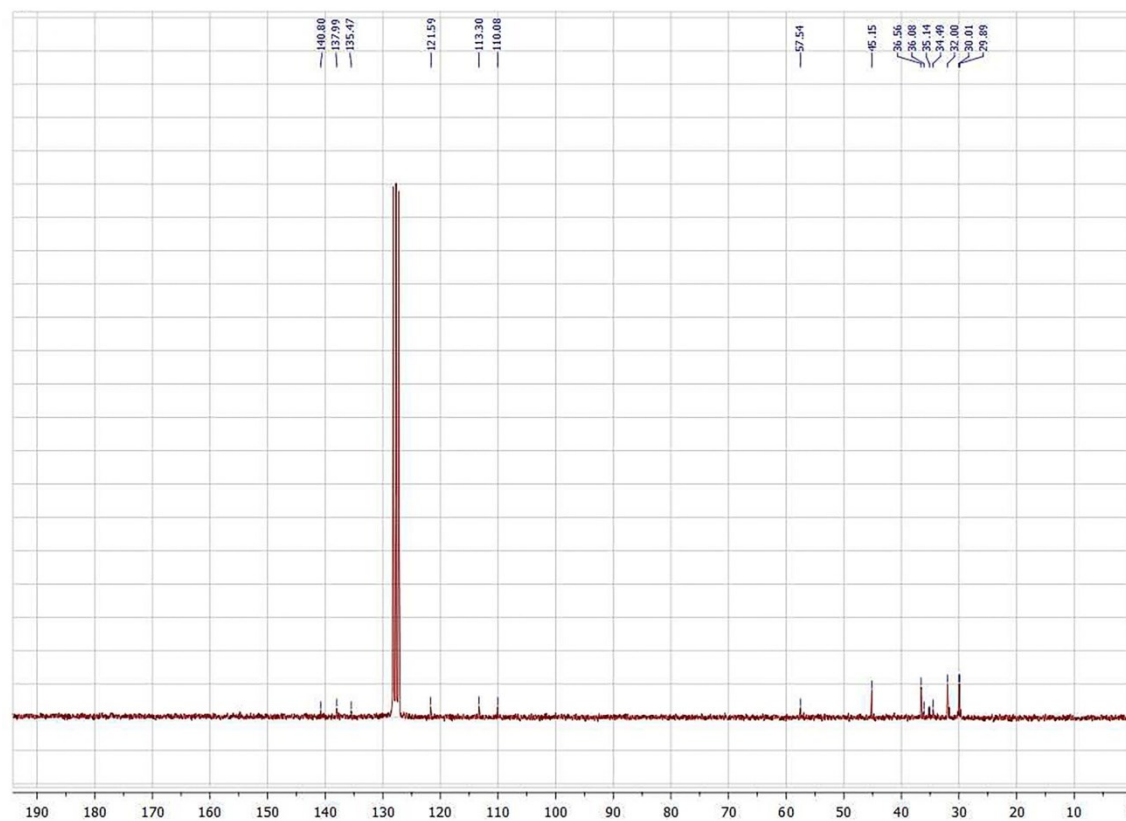

**Figure S13.**  $^1\text{H}$  NMR spectra for Hydroboration of  $\text{C}_6\text{H}_5\text{CHO}$  with HBpin in absence of catalyst in benzene- $\text{d}_6$ .

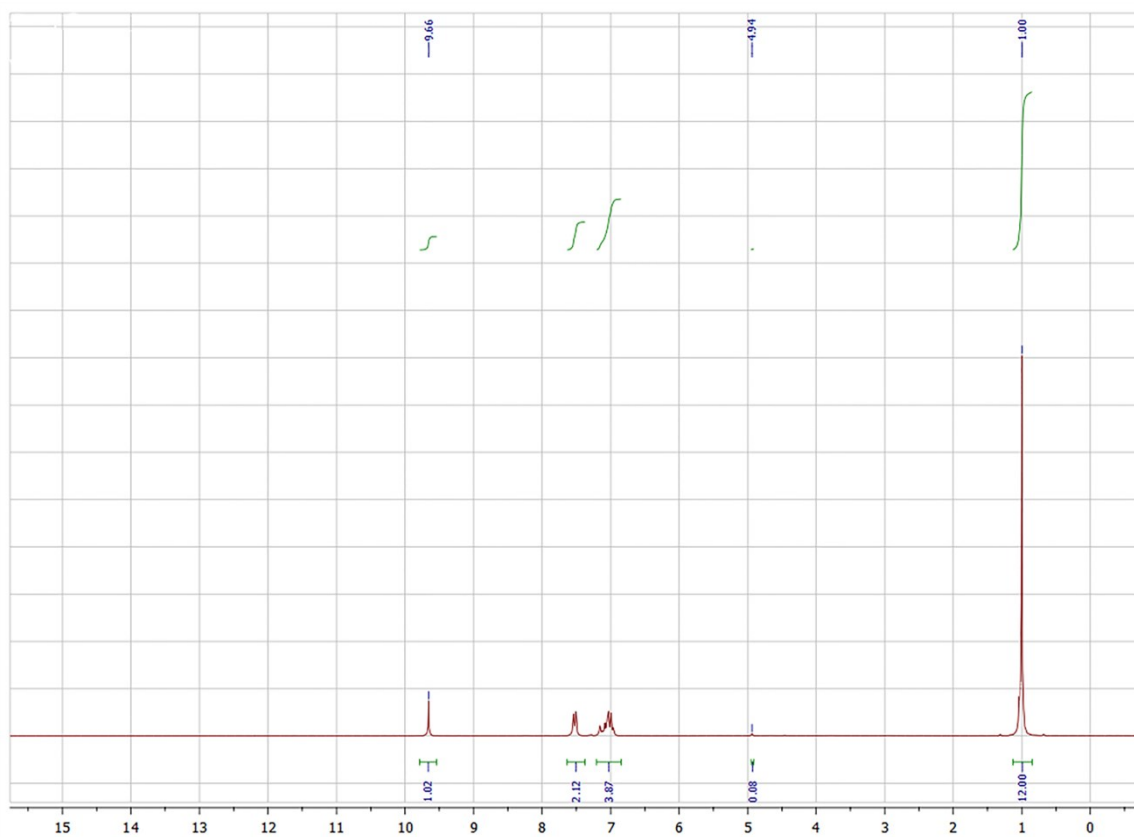

**Figure S14.**  $^1\text{H}$  NMR spectra for Cyanosilylation of  $\text{C}_6\text{H}_5\text{CHO}$  with HBpin in absence of catalyst in benzene- $\text{d}_6$ .

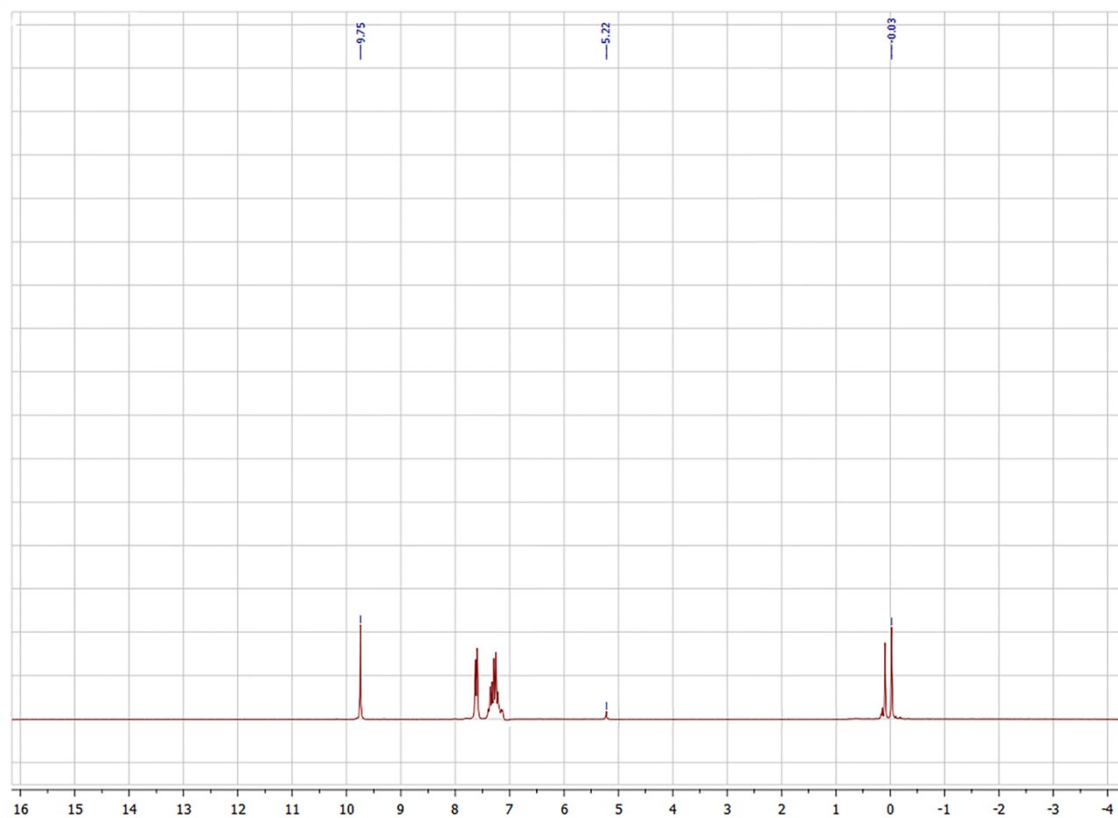

**Figure S15.**  $^1\text{H}$  NMR spectra for Hydroboration of  $\text{C}_6\text{H}_5\text{CHO}$  with HBpin in benzene- $\text{d}_6$  using catalyst (3) loading of 1 mol% for 1 hrs at room temperature.

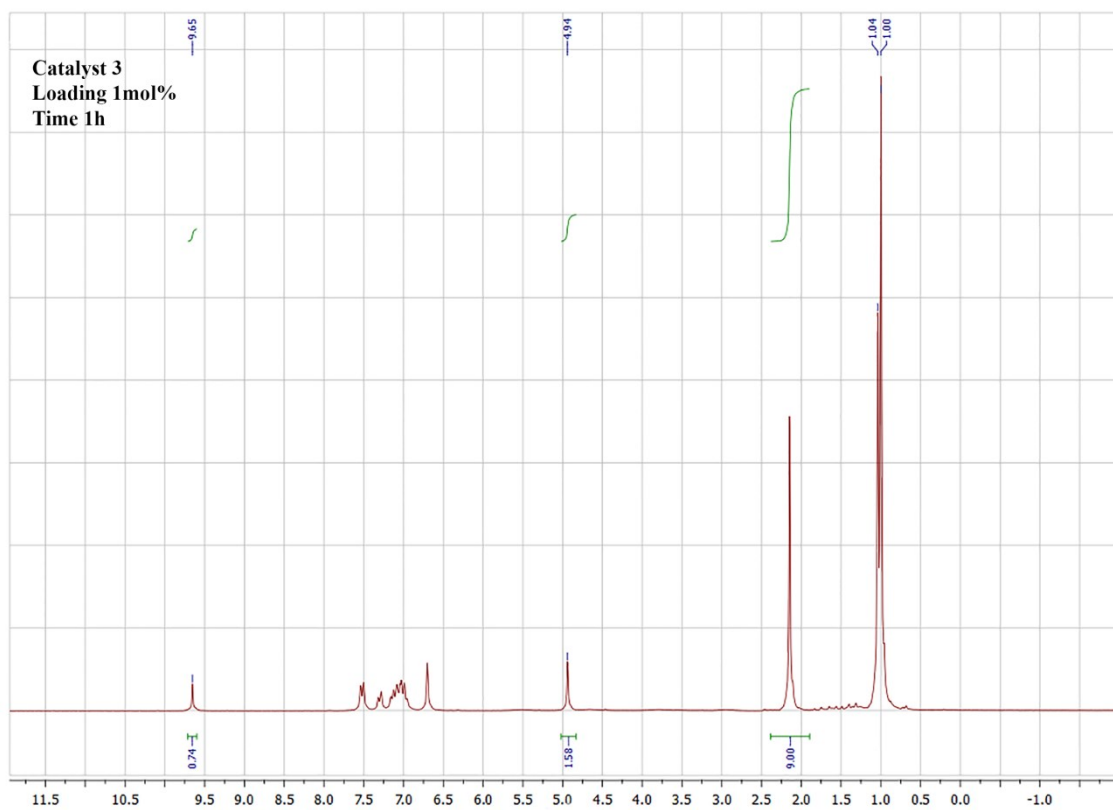

**Figure S16.**  $^1\text{H}$  NMR spectra for Hydroboration of  $\text{C}_6\text{H}_5\text{CHO}$  with HBpin in benzene- $\text{d}_6$  using catalyst (3) loading of 1 mol% for 3 hrs at room temperature.

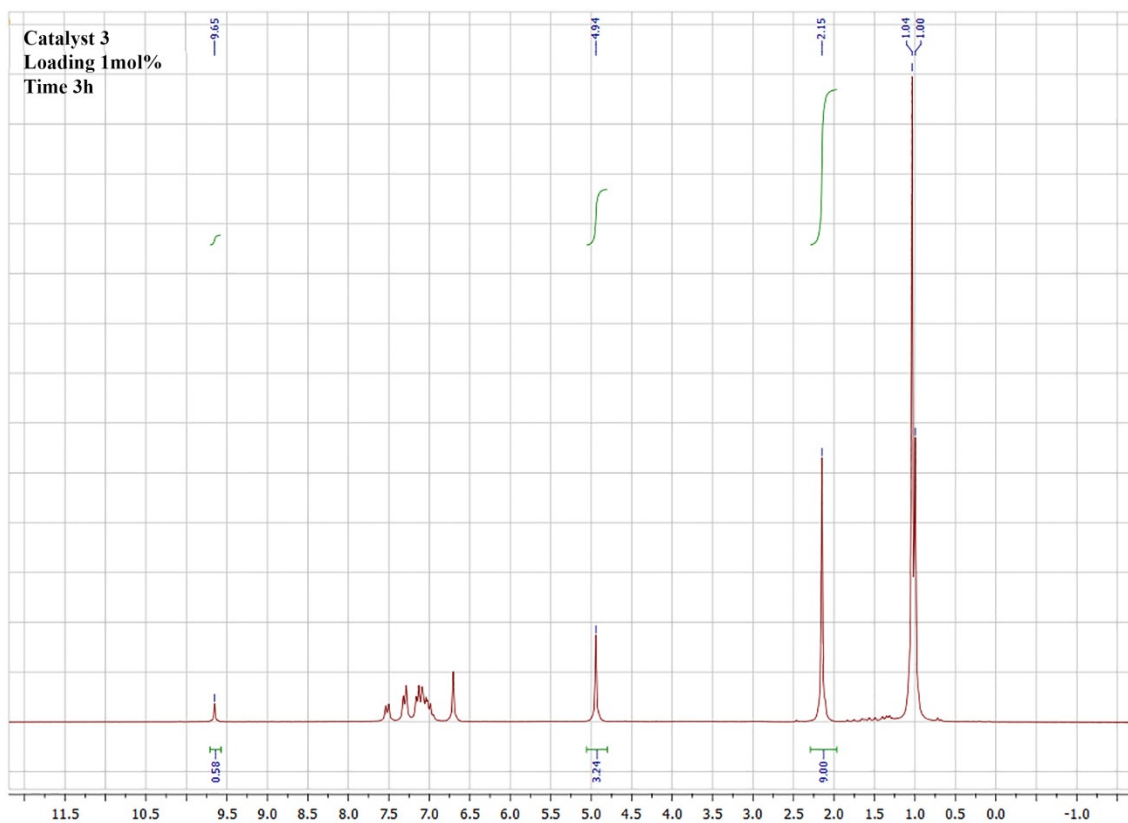

**Figure S17.**  $^1\text{H}$  NMR spectra for Hydroboration of  $\text{C}_6\text{H}_5\text{CHO}$  with HBpin in benzene- $\text{d}_6$  using catalyst (2) loading of 1 mol% for 1 hrs at room temperature.

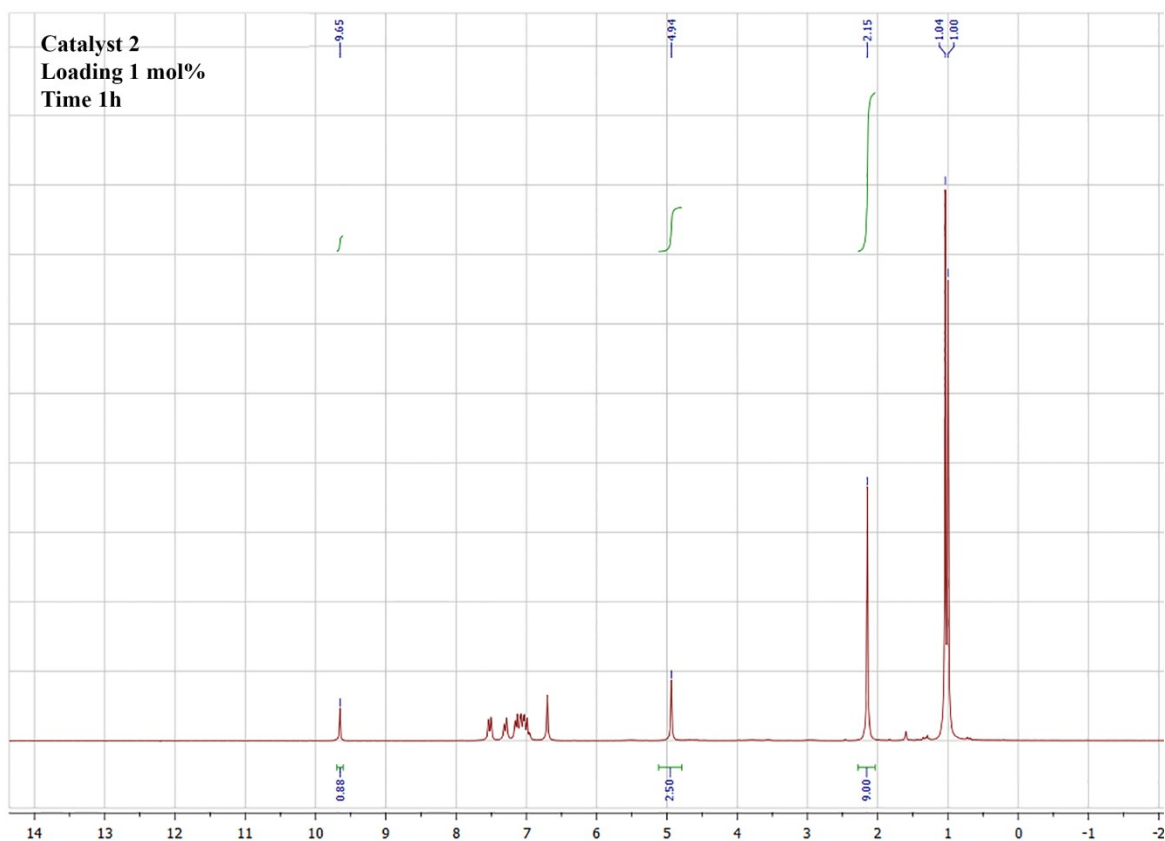

**Figure S18.**  $^1\text{H}$  NMR spectra for Hydroboration of  $\text{C}_6\text{H}_5\text{CHO}$  with HBpin in benzene- $\text{d}_6$  using catalyst (2) loading of 1 mol% for 3 hrs at room temperature.

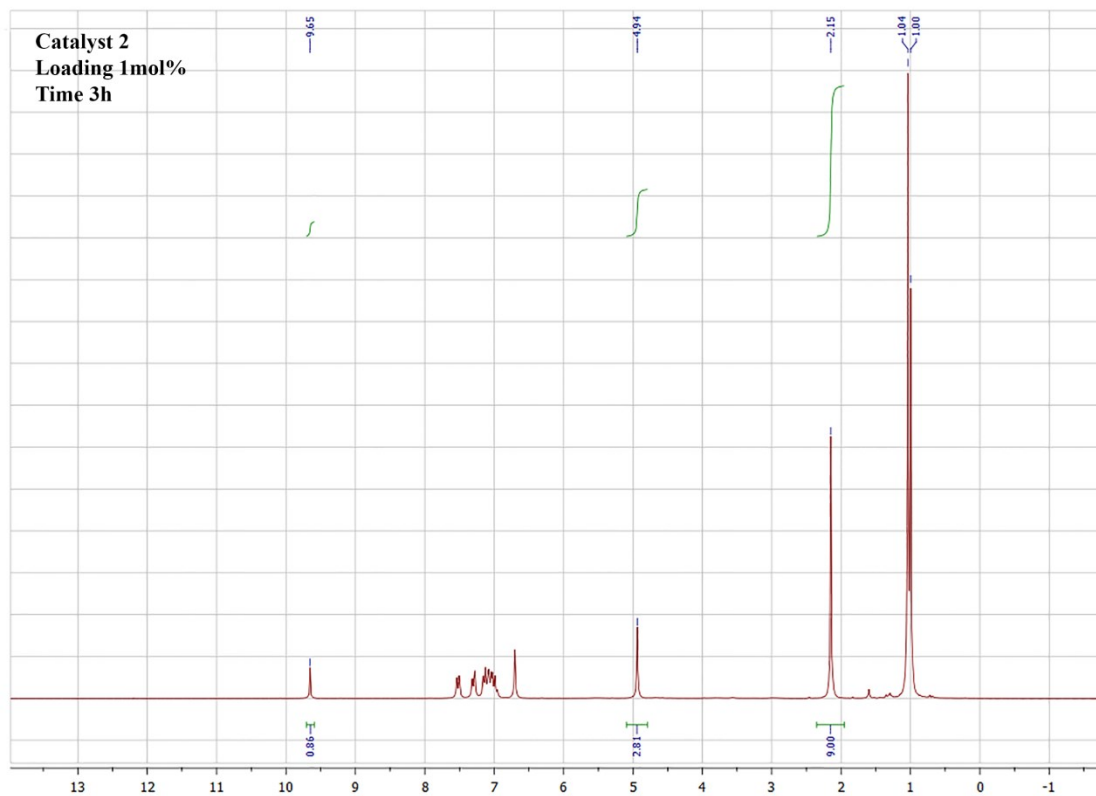

**Figure S19.**  $^1\text{H}$  NMR spectra for Hydroboration of  $\text{C}_6\text{H}_5\text{CHO}$  with HBpin in benzene- $\text{d}_6$  using catalyst (1) loading of 1 mol% for 1 hrs at room temperature.

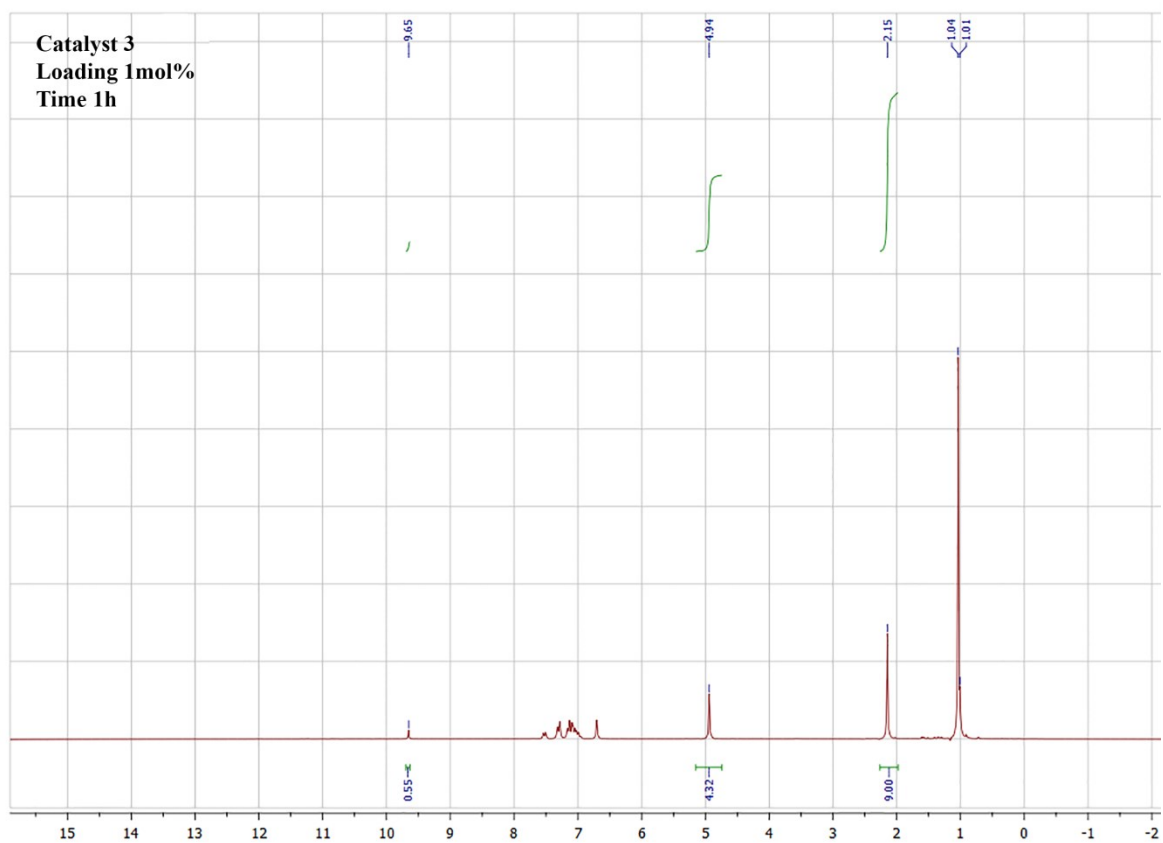

**Figure S20.**  $^1\text{H}$  NMR spectra for Hydroboration of  $\text{C}_6\text{H}_5\text{CHO}$  with HBpin in benzene- $\text{d}_6$  using catalyst (1) loading of 1 mol% for 3 hrs at room temperature.

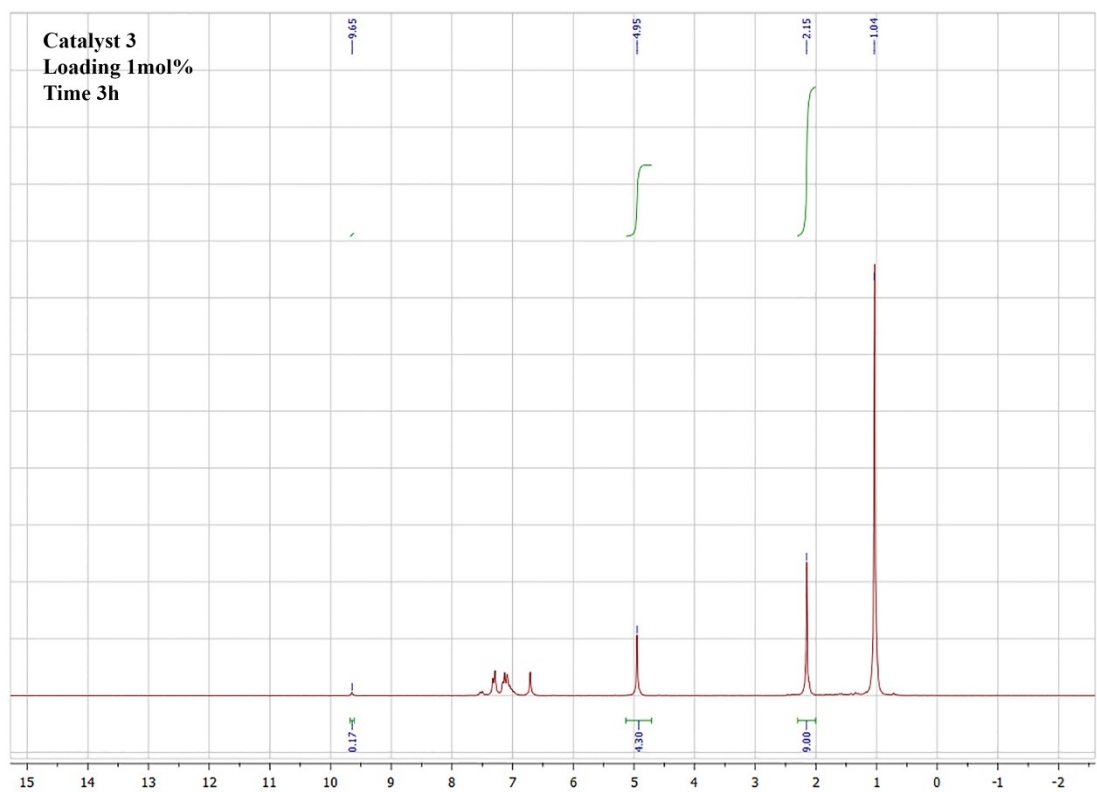

**Figure S21.**  $^1\text{H}$  NMR spectra for Hydroboration of  $\text{C}_6\text{H}_5\text{CHO}$  with HBpin in benzene- $\text{d}_6$  using catalyst (1) loading of 0.5 mol% for 1 hrs at room temperature.

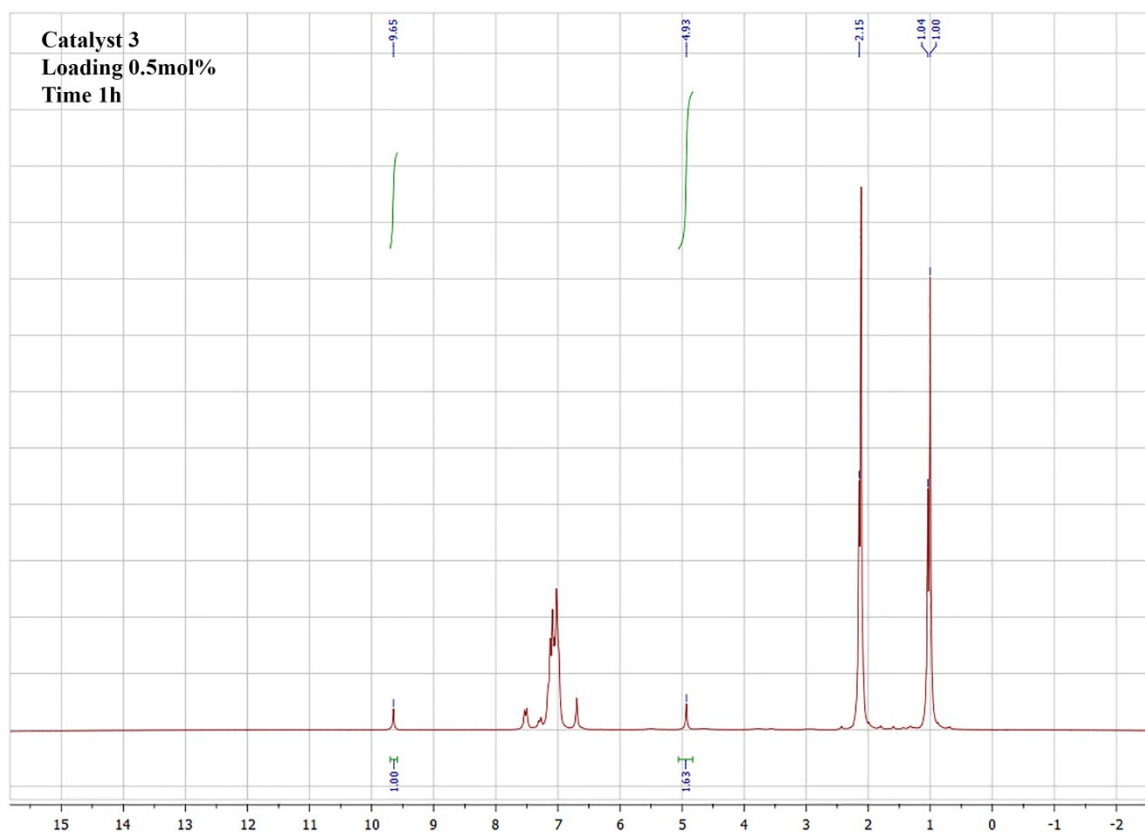

**Figure S22.**  $^1\text{H}$  NMR spectra for Hydroboration of  $\text{C}_6\text{H}_5\text{CHO}$  with HBpin in benzene- $\text{d}_6$  using catalyst (1) loading of 0.5 mol% for 3 hrs at room temperature.

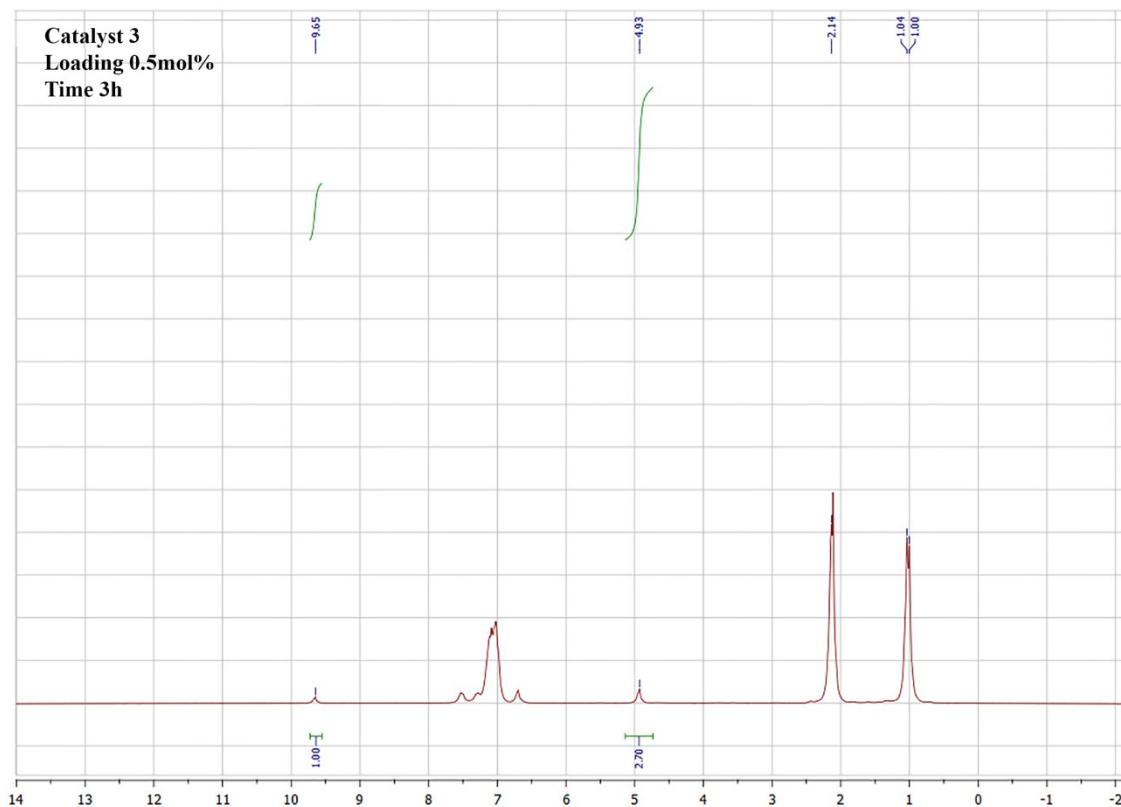



Figure S23.  $^1\text{H}$  NMR spectra for Cyanosilylation of  $\text{C}_6\text{H}_5\text{CHO}$  with  $\text{TMSCN}$  in benzene- $\text{d}_6$  using catalyst (1) loading of 1 mol% for 1 hrs at room temperature.

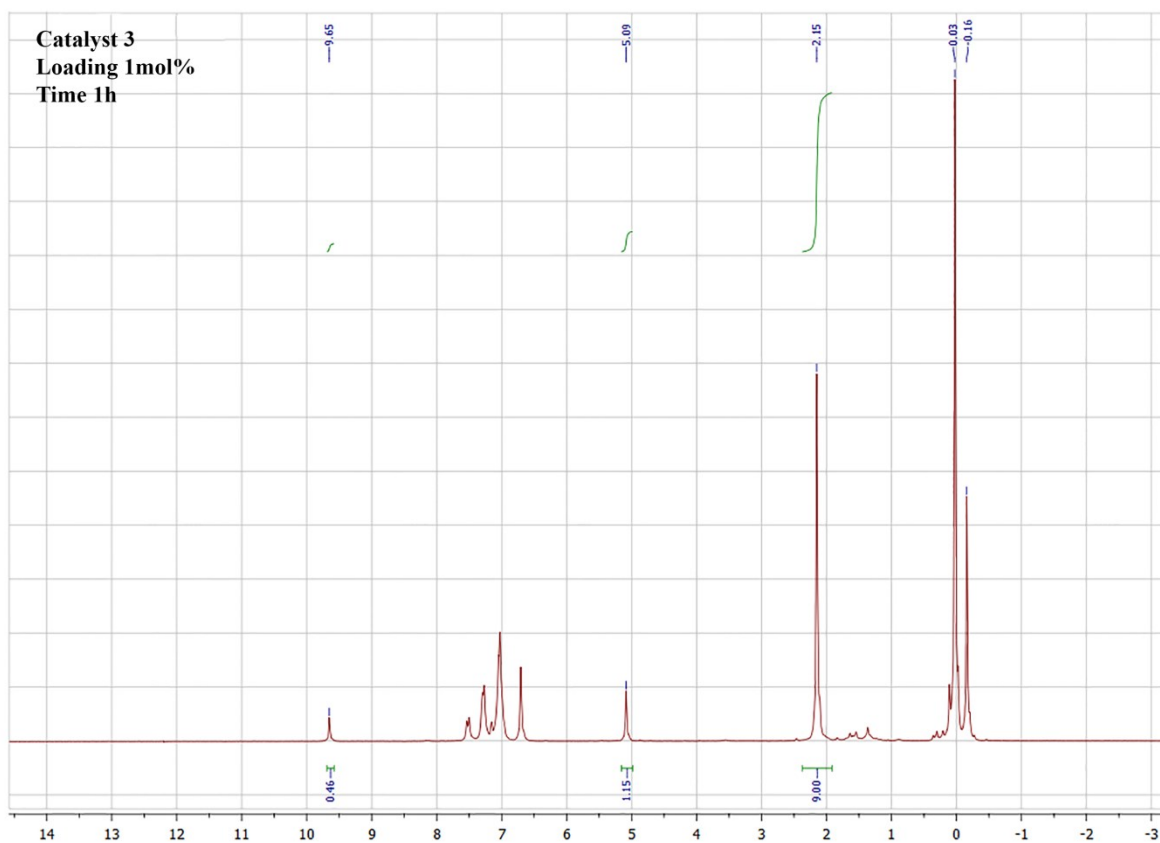

Figure S24.  $^1\text{H}$  NMR spectra for Cyanosilylation of  $\text{C}_6\text{H}_5\text{CHO}$  with  $\text{TMSCN}$  in benzene- $\text{d}_6$  using catalyst (1) loading of 1 mol% for 3 hrs at room temperature.

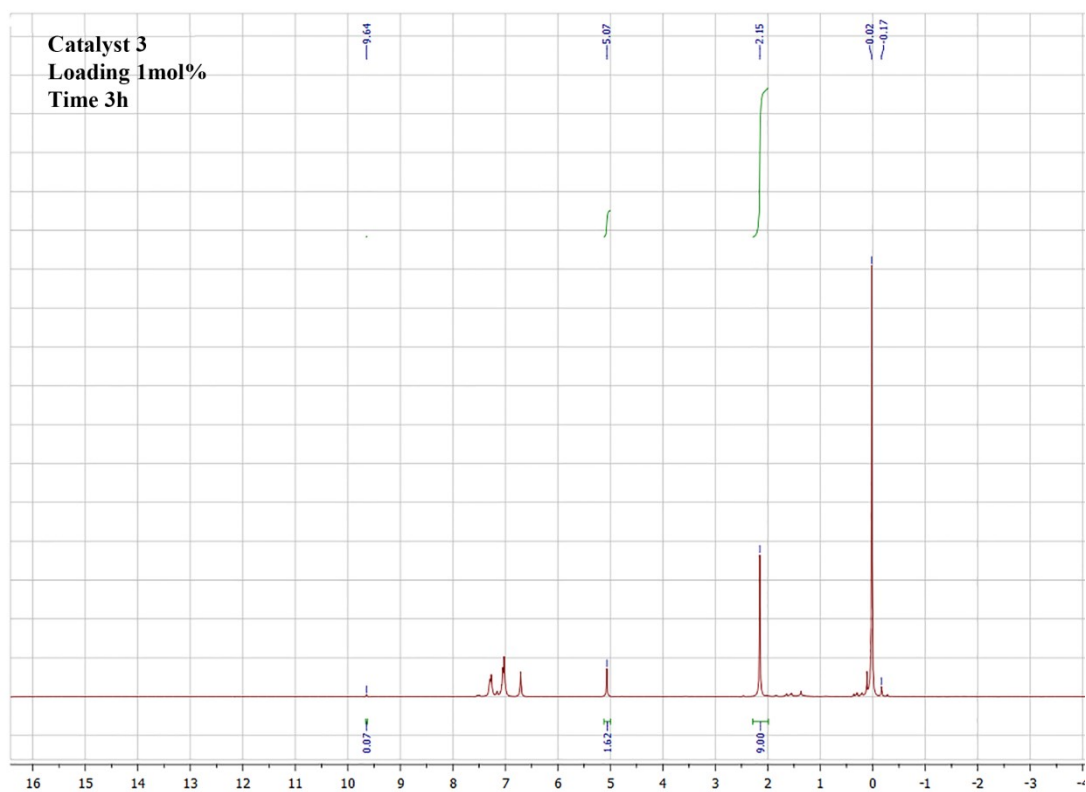

Figure S25.  $^1\text{H}$  NMR spectra for Cyanosilylation of  $\text{C}_6\text{H}_5\text{CHO}$  with  $\text{TMSCN}$  in benzene- $\text{d}_6$  using catalyst (1) loading of 0.25 mol% for 1 hrs at room temperature.

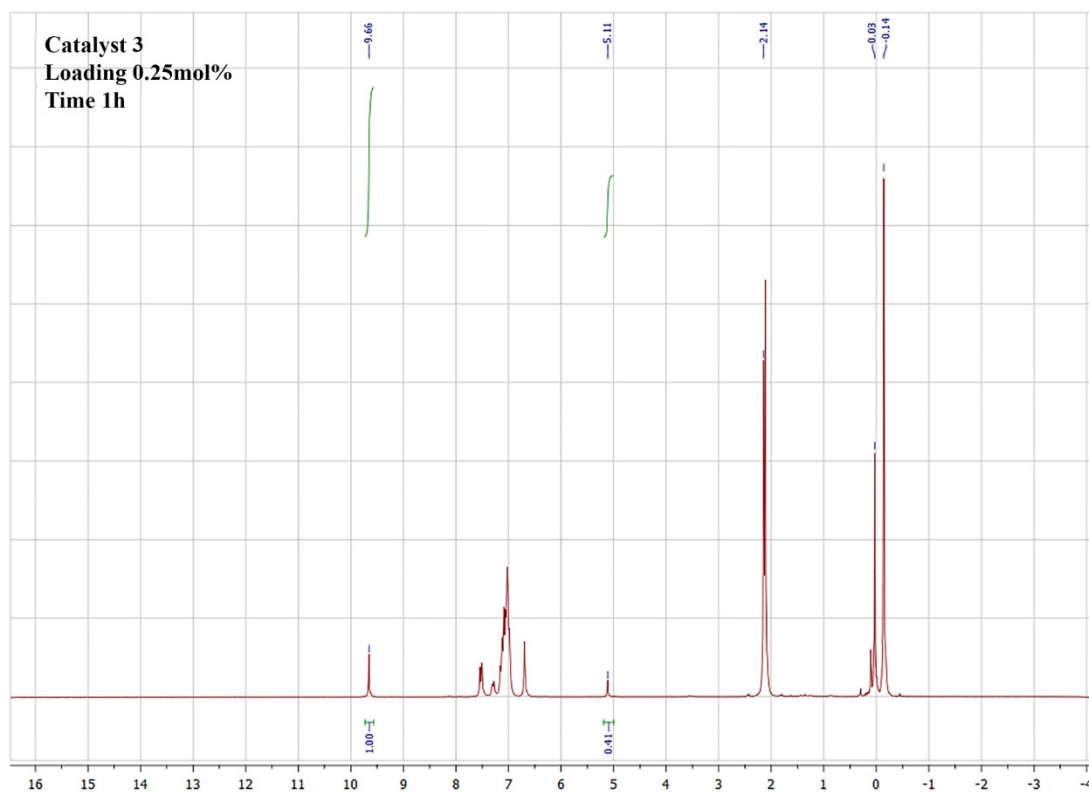

Figure S26.  $^1\text{H}$  NMR spectra for Cyanosilylation of  $\text{C}_6\text{H}_5\text{CHO}$  with  $\text{TMSCN}$  in benzene- $\text{d}_6$  using catalyst (1) loading of 0.25 mol% for 3 hrs at room temperature.

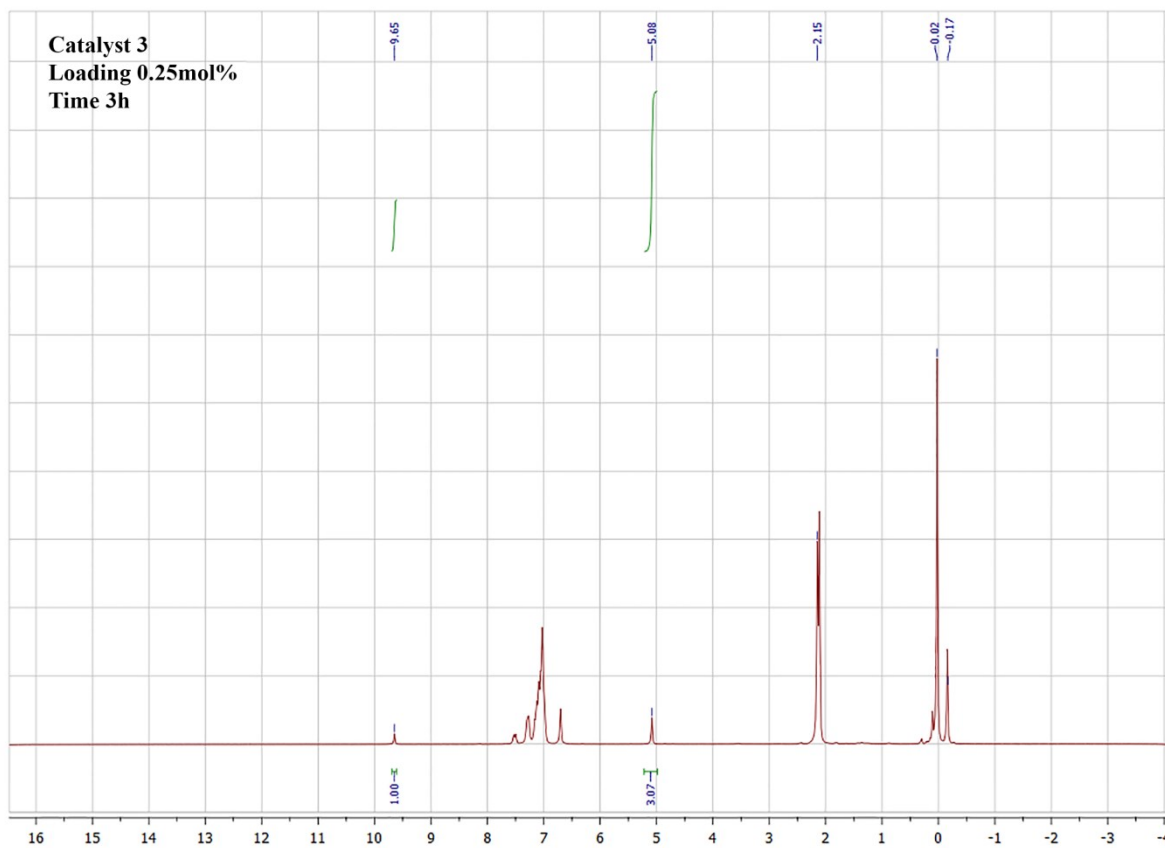

**Figure S27.**  $^1\text{H}$  NMR spectra for Hydroboration of 4-Nitrobenzaldehyde with HBPin in benzene- $\text{d}_6$  using catalyst (1) loading of 1 mol% for 1 hrs at room temperature.

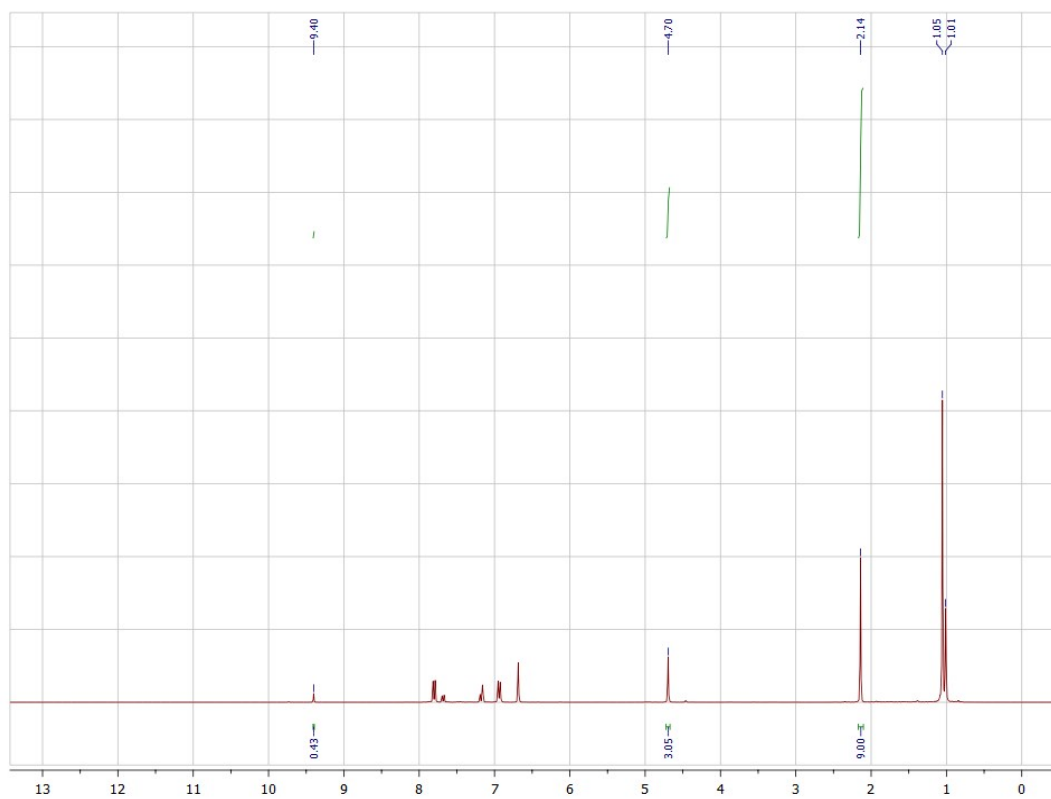

**Figure S28.**  $^1\text{H}$  NMR spectra for Hydroboration of 4-Nitrobenzaldehyde with HBPin in benzene- $\text{d}_6$  using catalyst (1) loading of 1 mol% for 3 hrs at room temperature.

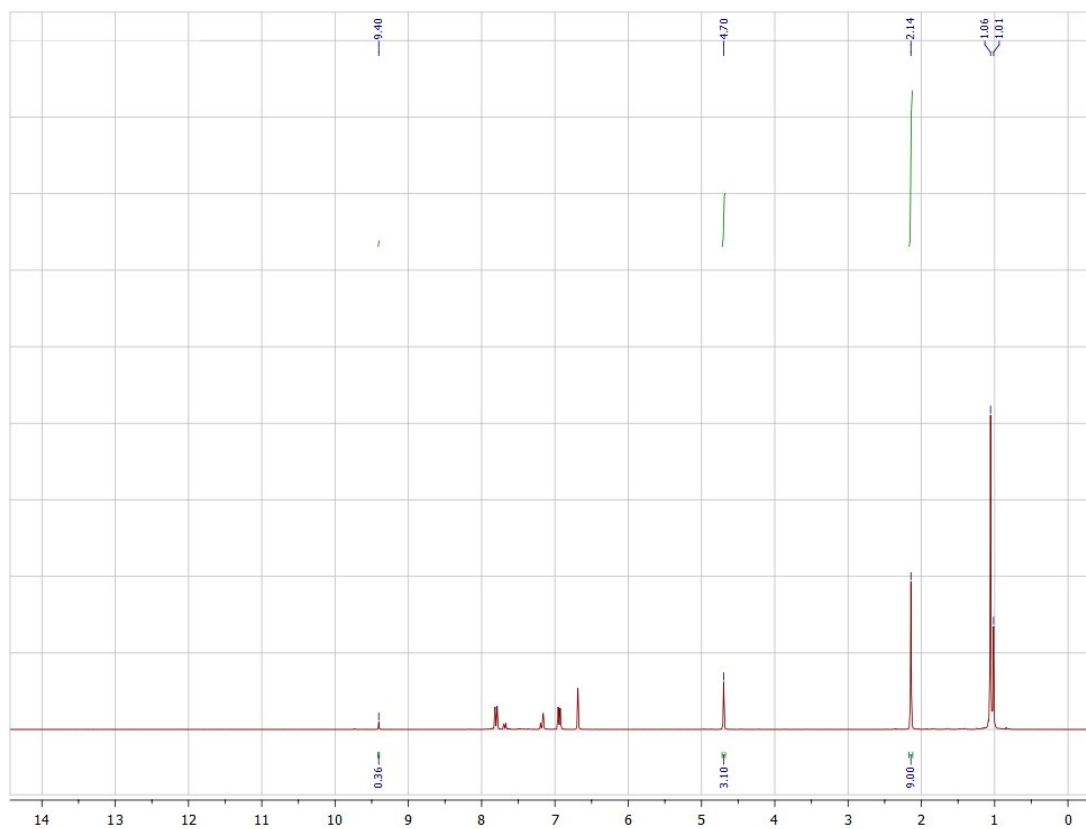

**Figure S29.**  $^1\text{H}$  NMR spectra for Hydroboration of 3-Nitrobenzaldehyde with HBPIn in benzene- $\text{d}_6$  using catalyst (1) loading of 1 mol% for 1 hrs at room temperature.

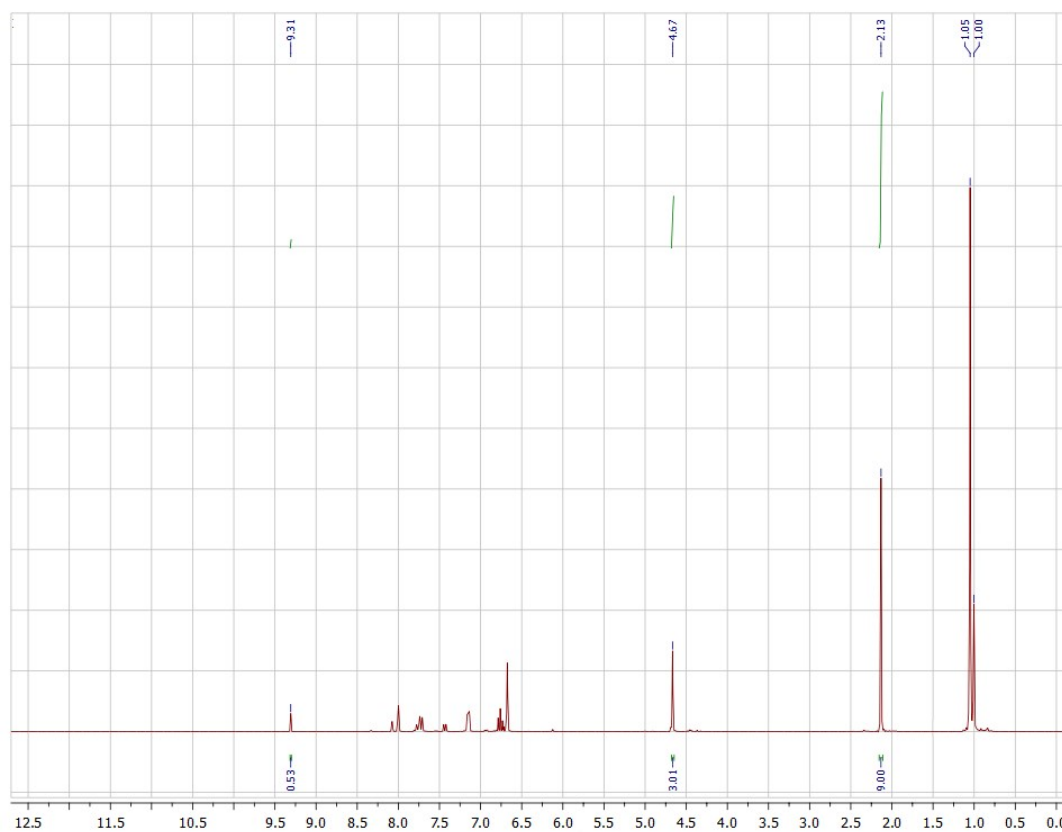

**Figure S30.**  $^1\text{H}$  NMR spectra for Hydroboration of 3-Nitrobenzaldehyde with HBPIn in benzene- $\text{d}_6$  using catalyst (1) loading of 1 mol% for 3 hrs at room temperature.

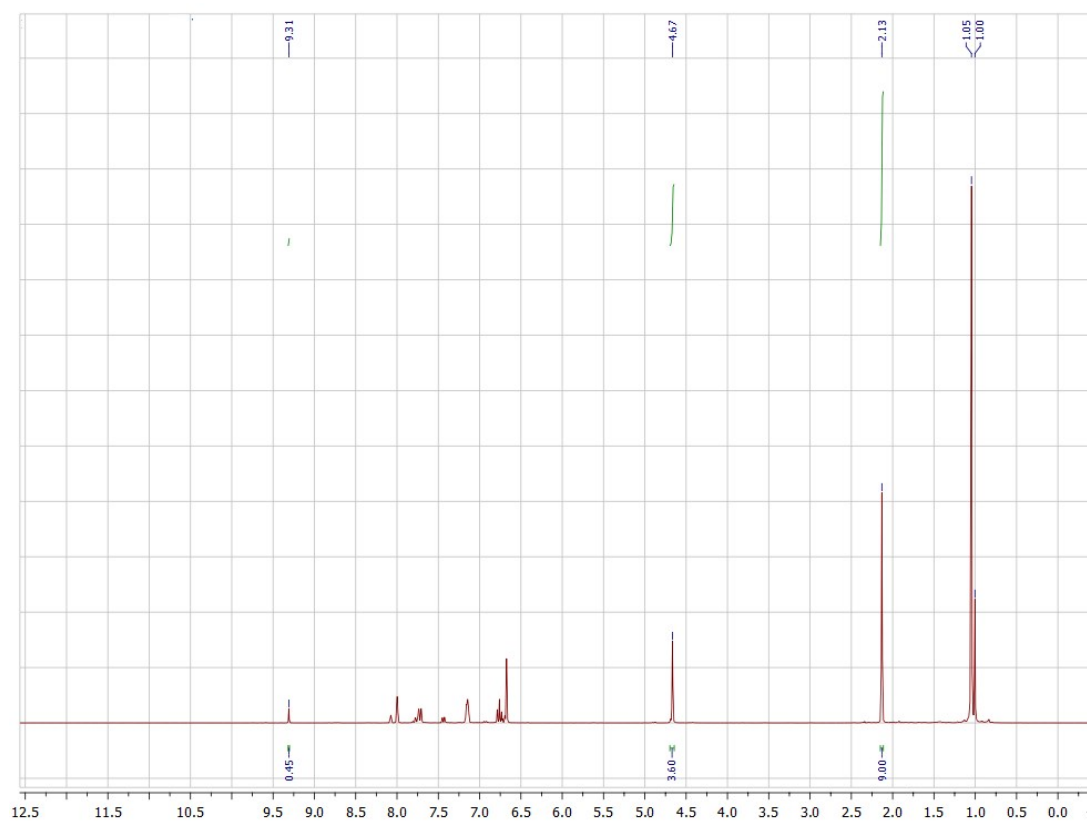

**Figure S31.  $^1\text{H}$  NMR spectra for Hydroboration of 2-Nitrobenzaldehyde with HBPIn in benzene- $\text{d}_6$  using catalyst (1) loading of 1 mol% for 1 hrs at room temperature.**

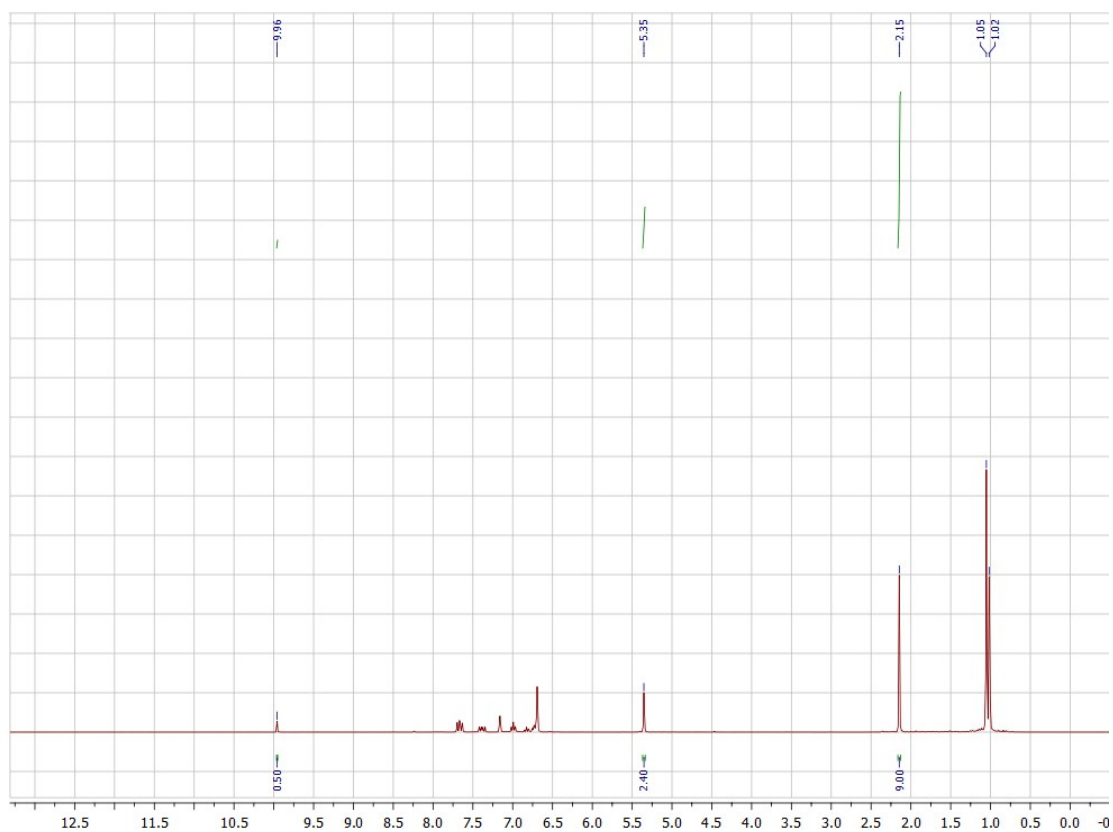

**Figure S32.  $^1\text{H}$  NMR spectra for Hydroboration of 2-Nitrobenzaldehyde with HBPIn in benzene- $\text{d}_6$  using catalyst (1) loading of 1 mol% for 3 hrs at room temperature.**

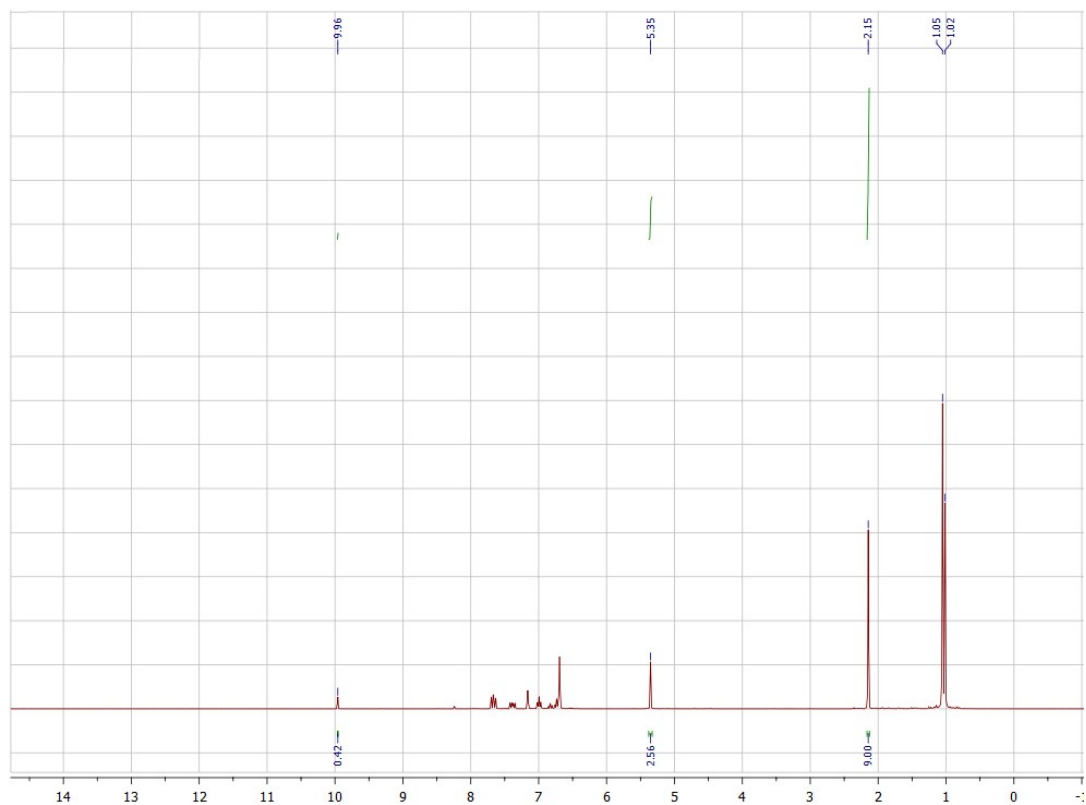

**Figure S33.**  $^1\text{H}$  NMR spectra for Hydroboration of 3,4-Dichlorobenzaldehyde with HBPIn in benzene- $\text{d}_6$  using catalyst (1) loading of 1 mol% for 1 hrs at room temperature.

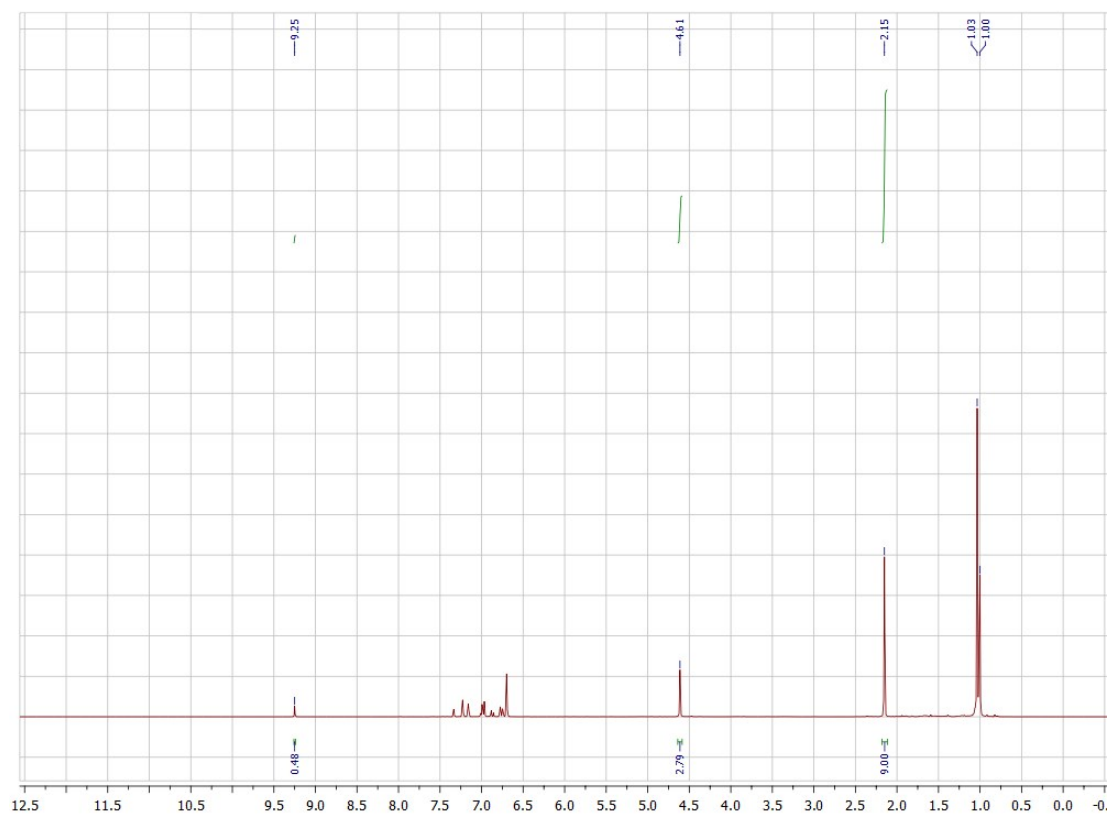

**Figure S34.**  $^1\text{H}$  NMR spectra for Hydroboration of 3,4-Dichlorobenzaldehyde with HBPIn in benzene- $\text{d}_6$  using catalyst (1) loading of 1 mol% for 3 hrs at room temperature.

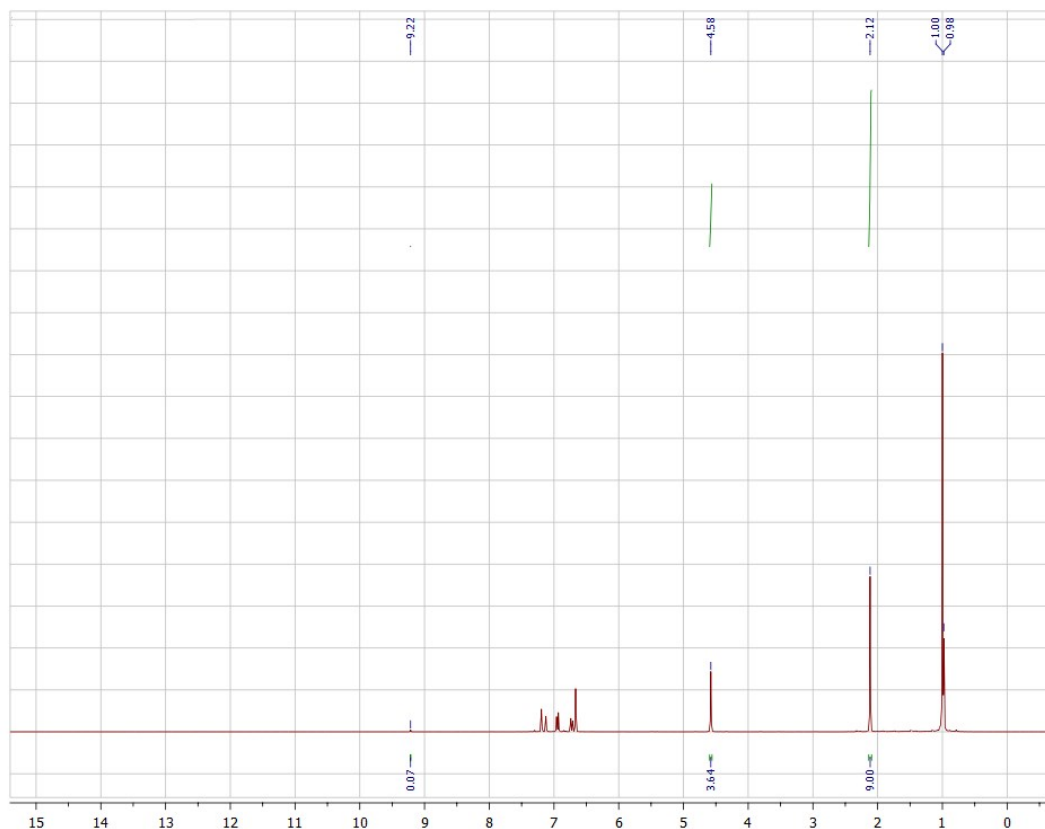

**Figure S35.**  $^1\text{H}$  NMR spectra for Hydroboration of 4-Methylbenzaldehyde with HBPin in benzene- $\text{d}_6$  using catalyst (1) loading of 1 mol% for 1 hrs at room temperature.

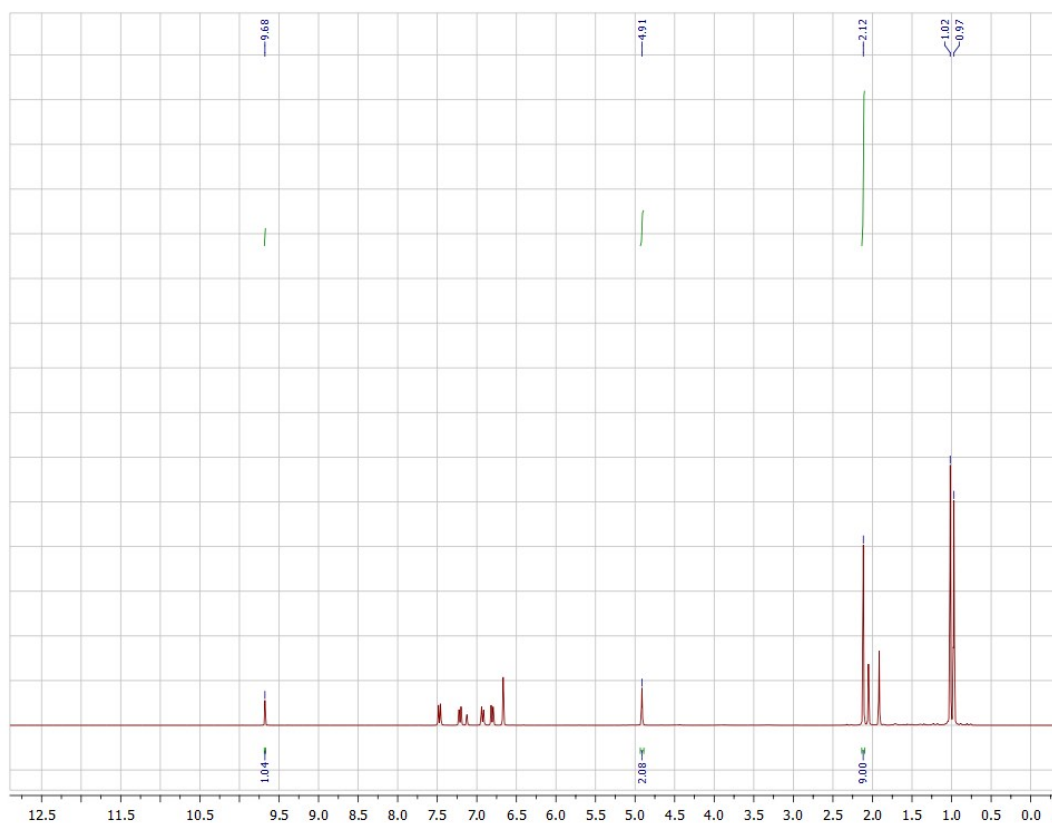

**Figure S36.**  $^1\text{H}$  NMR spectra for Hydroboration of 4-Methylbenzaldehyde with HBPin in benzene- $\text{d}_6$  using catalyst (1) loading of 1 mol% for 3 hrs at room temperature.

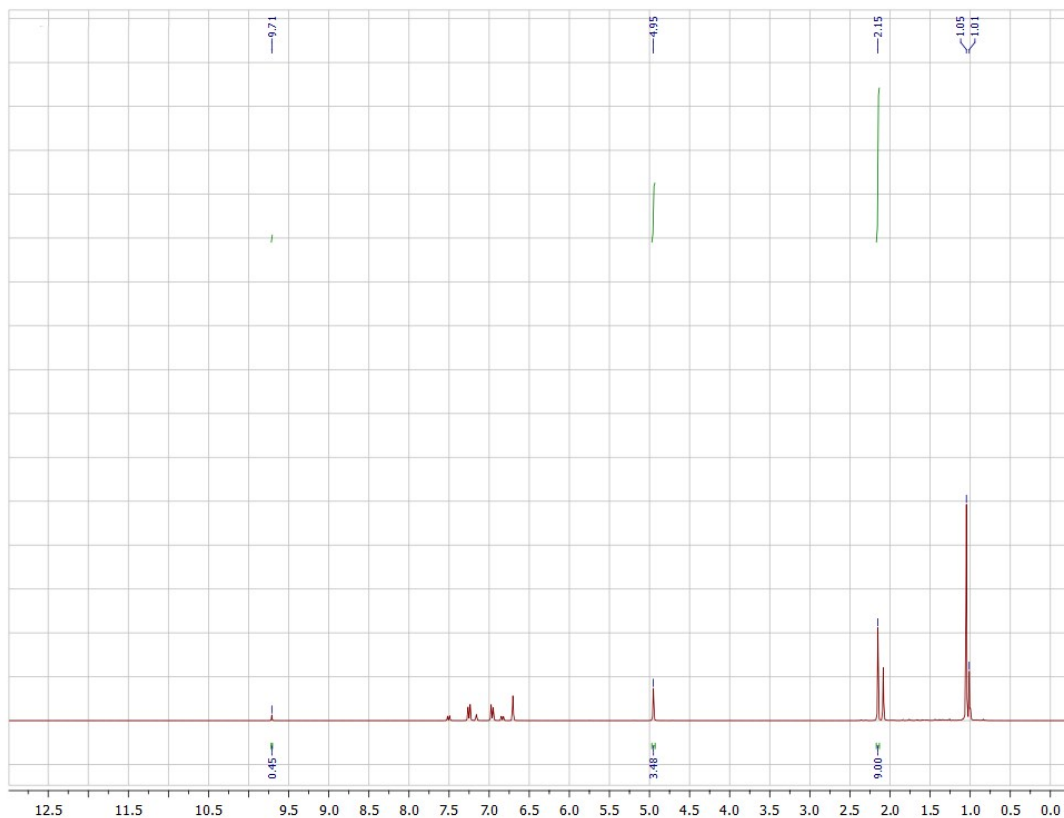

**Figure S37.**  $^1\text{H}$  NMR spectra for Hydroboration of 4-Methoxybenzaldehyde with HBPin in benzene- $\text{d}_6$  using catalyst (1) loading of 1 mol% for 1 hrs at room temperature.

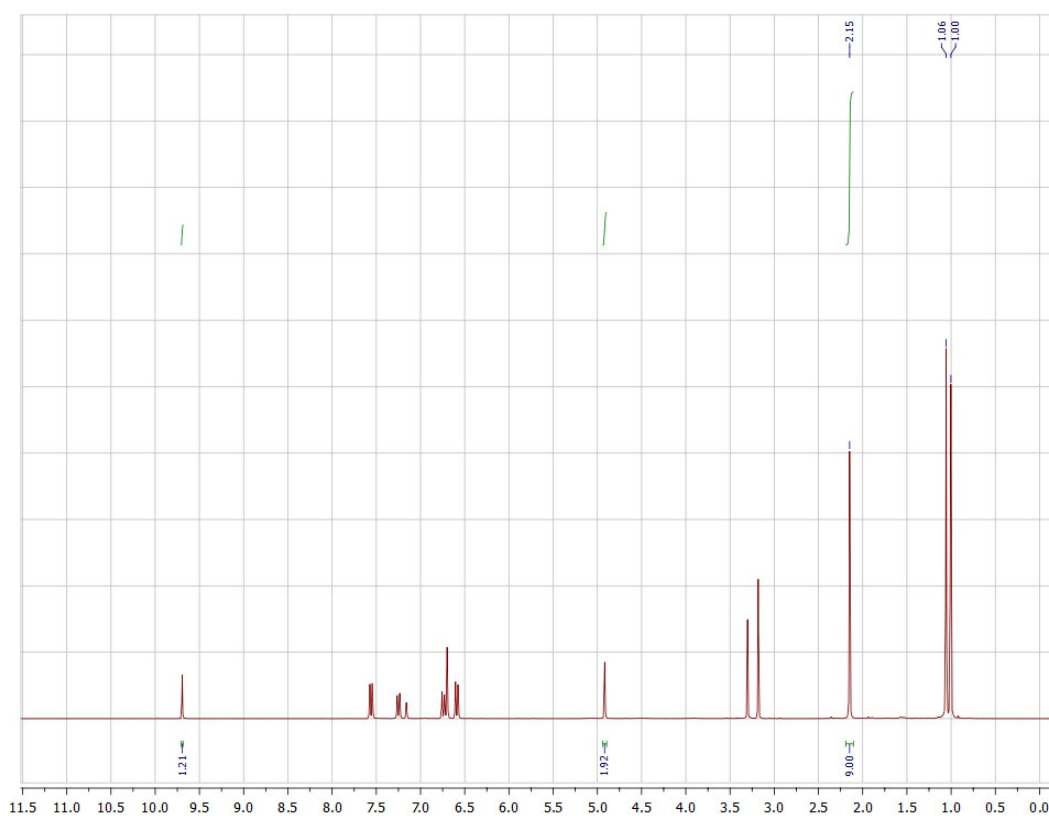

**Figure S38.**  $^1\text{H}$  NMR spectra for Hydroboration of 4-Methoxybenzaldehyde with HBPin in benzene- $\text{d}_6$  using catalyst (1) loading of 1 mol% for 3 hrs at room temperature.

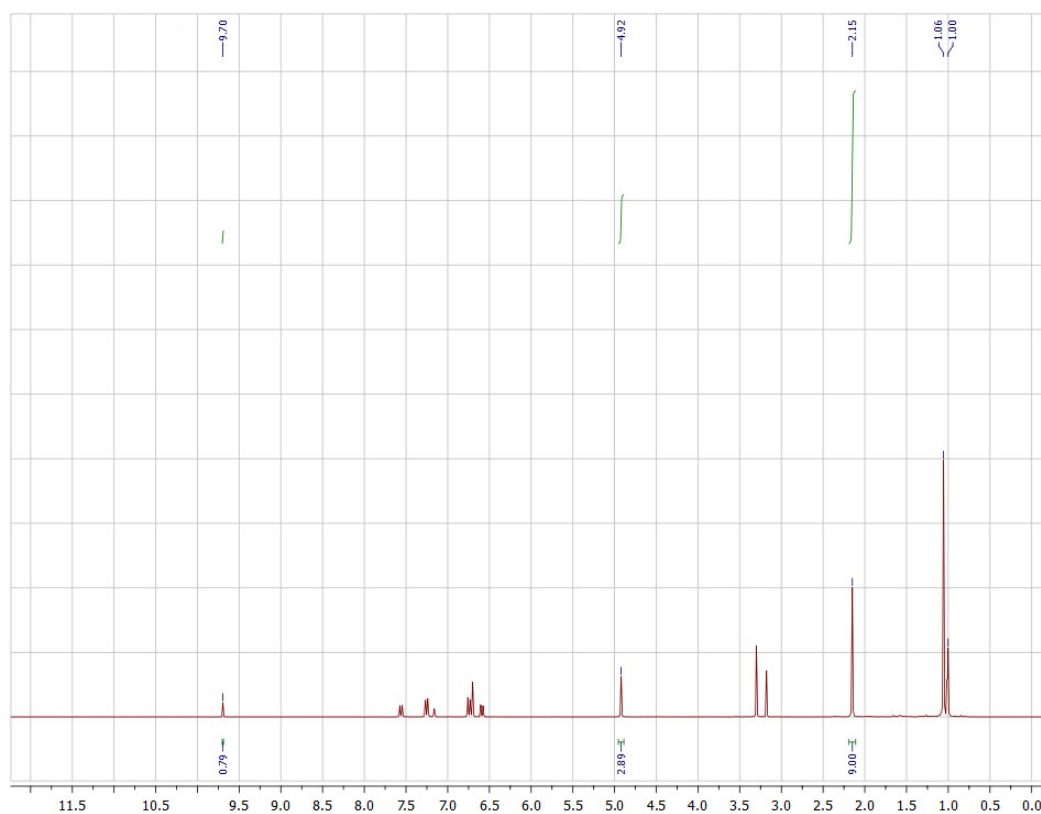



**Figure S39.**  $^1\text{H}$  NMR spectra for Hydroboration of 4-(dimethylamino)benzaldehyde with HBPin in benzene- $\text{d}_6$  using catalyst (1) loading of 1 mol% for 1 hrs at room temperature.

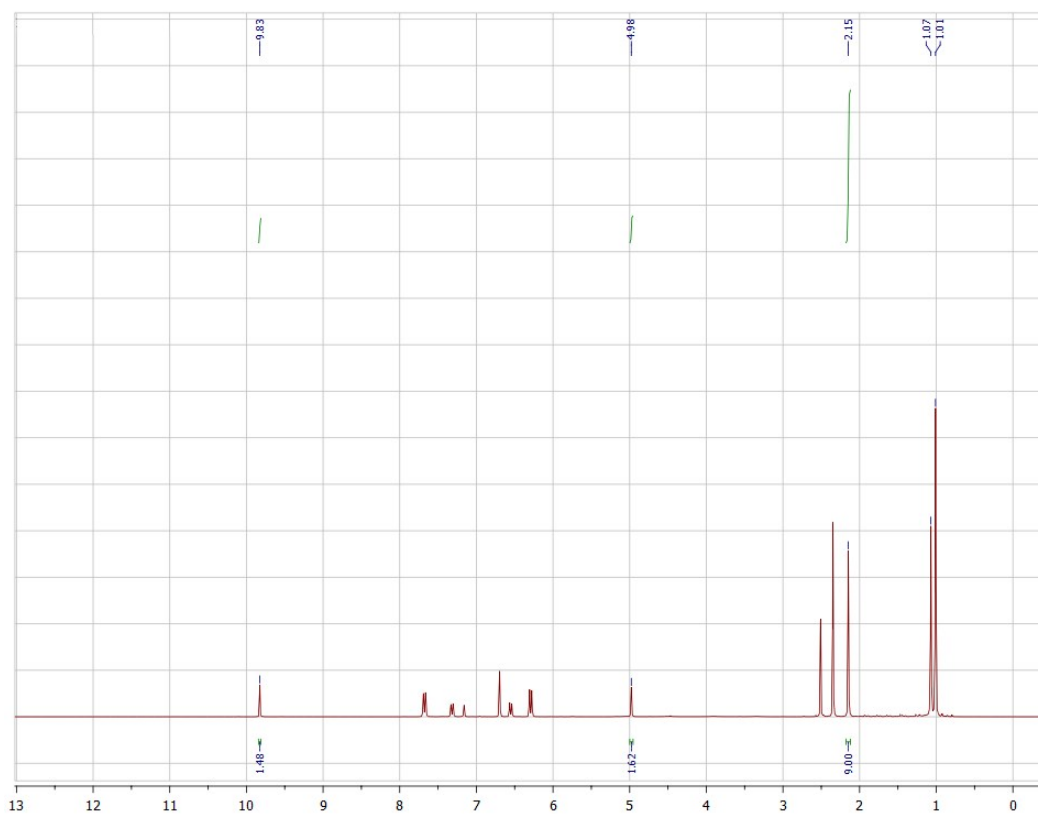

**Figure S40.**  $^1\text{H}$  NMR spectra for Hydroboration of 4-(dimethylamino)benzaldehyde with HBPin in benzene- $\text{d}_6$  using catalyst (1) loading of 1 mol% for 3 hrs at room temperature.

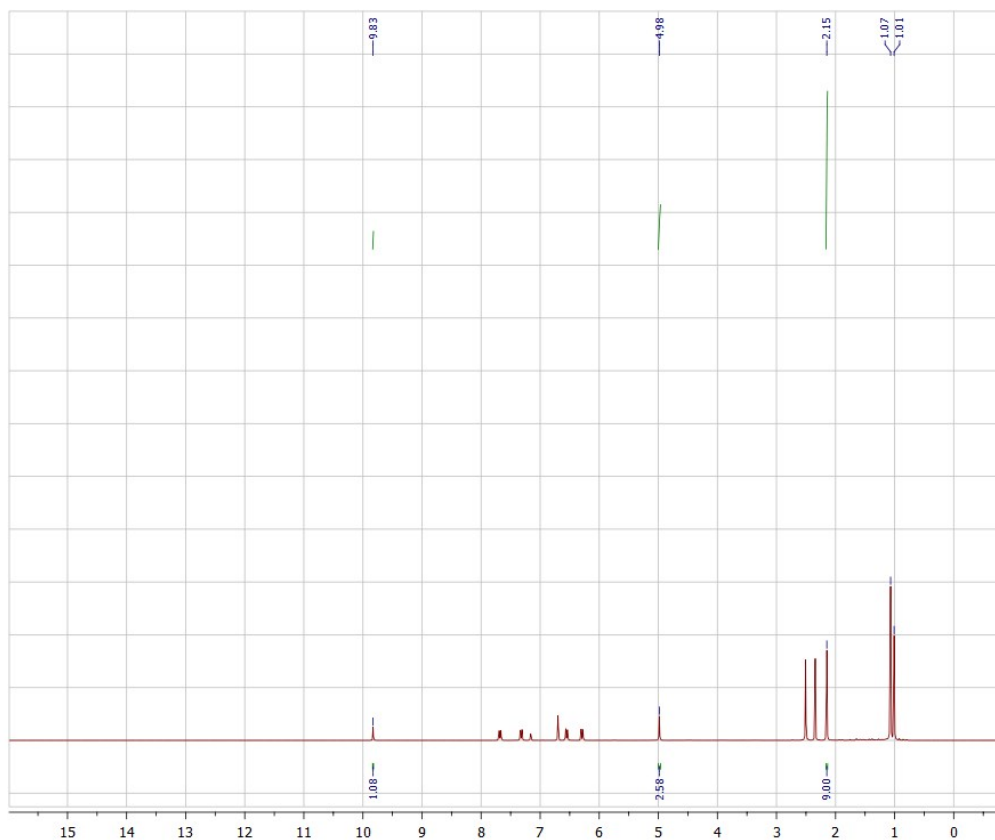

**Figure S41.  $^1\text{H}$  NMR spectra for Hydroboration of PhCHO with HBPin in benzene- $d_6$  using catalyst (1) loading of 1 mol% for 1-3 hrs at room temperature.**

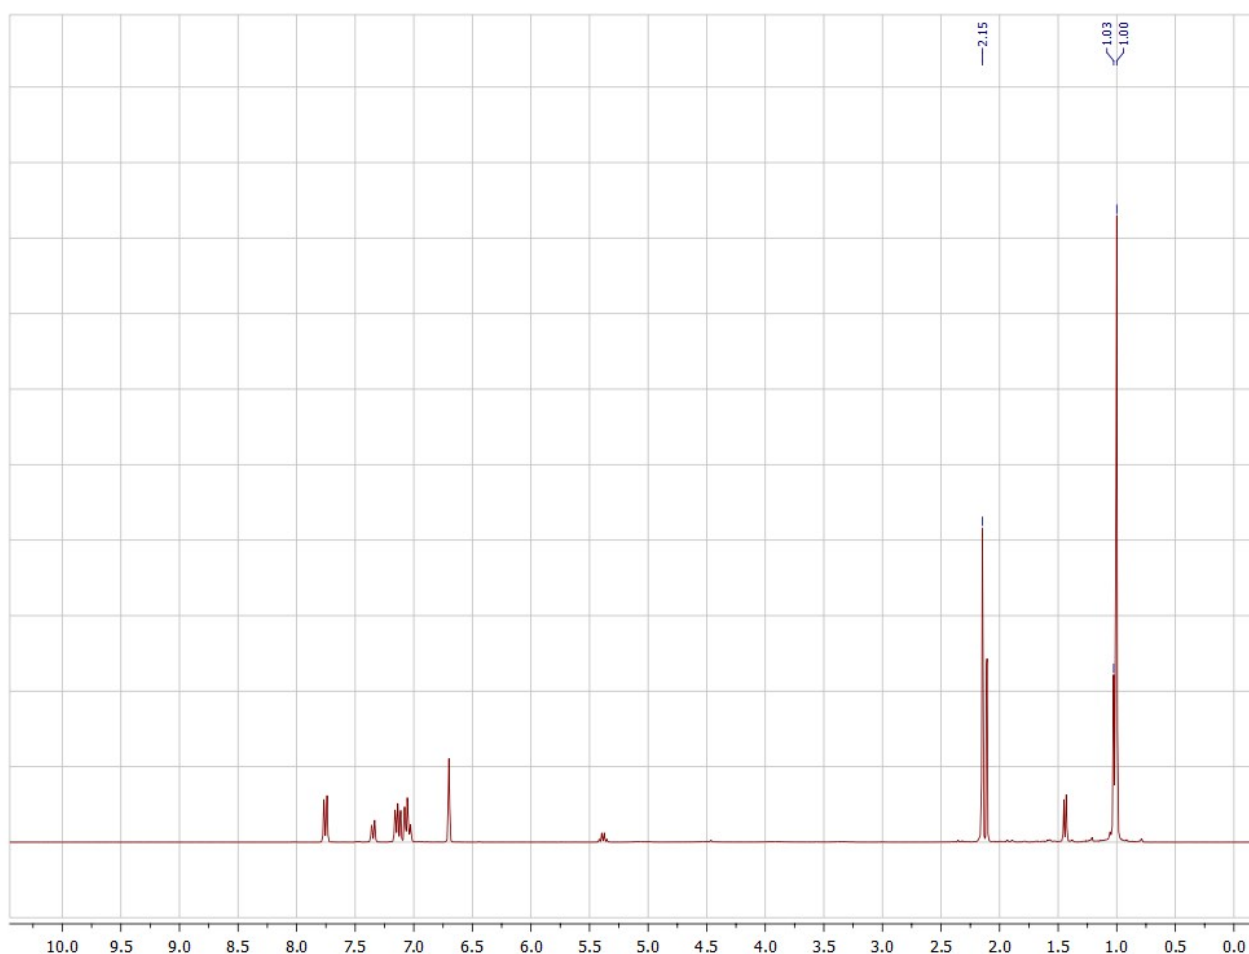

## **NMR spectra of pure products.**

### **4,4,5,5-tetramethyl-2-(benzyloxy)-1,3,2-dioxaborolane**

$^1\text{H}$  NMR (300 MHz,  $\text{C}_6\text{D}_6$ )  $\delta$  (ppm) = 1.04 (s, 12H), 4.94 (s, 2H), 7.15-7.19 (m, 1H), 7.26-7.35 (m, 4H).

$^{13}\text{C}$  NMR (300 MHz,  $\text{C}_6\text{D}_6$ )  $\delta$  (ppm) = 24.5, 66.6, 82.9, 126.6, 127.3, 128.2, 139.1.

$^{11}\text{B}$  NMR (400 MHz,  $\text{C}_6\text{D}_6$ )  $\delta$  (ppm) = 22.5.

### **2-phenyl-2-((trimethylsilyl)oxy)propanenitrile**

$^1\text{H}$  NMR (300 MHz,  $\text{C}_6\text{D}_6$ )  $\delta$  (ppm) = 0.03 (s, 9H), 5.11 (s, 1H), 7.33-7.42 (m, 3H), 7.54-7.55 (m, 2H).

$^{13}\text{C}$  NMR (300 MHz,  $\text{C}_6\text{D}_6$ )  $\delta$  (ppm) = 1.0, 33.6, 71.6, 121.6, 124.6, 128.6, 142.0.

$^{29}\text{Si}$  NMR (400 MHz,  $\text{C}_6\text{D}_6$ )  $\delta$  (ppm) = 24.3.

**4,4,5,5-tetramethyl-2-((4-methoxybenzyl)oxy)-1,3,2-dioxaborolane (a)**

$^1\text{H}$  NMR (300 MHz,  $\text{C}_6\text{D}_6$ )  $\delta$  (ppm) = 1.06 (s, 12H), 3.21 (s, 3H), 4.87 (s, 2H), 6.53 (d, 2H), 7.51 (d, 2H).

$^{13}\text{C}$  NMR (300 MHz,  $\text{C}_6\text{D}_6$ )  $\delta$  (ppm) = 24.6, 55.4, 66.6, 83.0, 113.8, 113.9, 128.6, 129.5, 131.6, 159.1.

$^{11}\text{B}$  NMR (400 MHz  $\text{C}_6\text{D}_6$ )  $\delta$  (ppm) = 22.3.

**2-((2,4-dichlorobenzyl)oxy)-4,4,5,5-tetramethyl-1,3,2-dioxaborolane (b).**

$^1\text{H}$  NMR (300 MHz,  $\text{C}_6\text{D}_6$ ):  $\delta$  (ppm) = 1.03 (s, 12H), 4.61 (s, 2H), 6.99 (d, 1H), 6.75 (d, 1H), 7.21 (dd, 1H).

$^{13}\text{C}$ -{1H} NMR (300 MHz,  $\text{C}_6\text{D}_6$ ):  $\delta$  (ppm) = 24.5, 63.5, 83.0, 127.0, 128.6, 128.8, 131.9, 133.4, 135.4,.

$^{11}\text{B}$ {1H} NMR (400 MHz,  $\text{C}_6\text{D}_6$ ):  $\delta$  (ppm) = B 22.3

**4,4,5,5-tetramethyl-2-((4-methylbenzyl)oxy)-1,3,2-dioxaborolane (c)**

$^1\text{H}$  NMR (300 MHz,  $\text{C}_6\text{D}_6$ )  $\delta$  (ppm) = 1.02 (s, 12H), 1.96 (s, 3H), 4.91 (s, 2H), 7.20 (d, 2H), 7.48-7.5 (m, 2H).

$^{13}\text{C}$  NMR (300 MHz,  $\text{C}_6\text{D}_6$ )  $\delta$  (ppm) = 21.3, 24.7, 66.7, 83.0, 127.0, 127.2, 129.1, 129.3, 136.4, 137.1.

$^{11}\text{B}$  NMR (400 MHz,  $\text{C}_6\text{D}_6$ )  $\delta$  (ppm) = 22.5.

**N,N-dimethyl-4-(((4,4,5,5-tetramethyl-1,3,2-dioxaborolan-2-yl)oxy)methyl)aniline (d)**

$^1\text{H}$  NMR (300 MHz,  $\text{C}_6\text{D}_6$ )  $\delta$  (ppm) = 1.07 (s, 12H), 2.20 (s, 6H), 4.98 (s, 2H), 6.30 (d, 2H), 7.86 (d, 2H).

$^{13}\text{C}$  NMR (300 MHz,  $\text{C}_6\text{D}_6$ )  $\delta$  (ppm) = 24.7, 40.3, 61.6, 83.2, 112.1, 127.2, 129.1, 149.7.

$^{11}\text{B}$  NMR (400 MHz,  $\text{C}_6\text{D}_6$ )  $\delta$  (ppm) = 22.3.

**4,4,5,5-tetramethyl-2-((4-nitrobenzyl)oxy)-1,3,2-dioxaborolane (e)**

$^1\text{H}$  NMR (300 MHz,  $\text{C}_6\text{D}_6$ )  $\delta$  (ppm) = 1.05 (s, 12H), 4.70 (s, 2H), 6.98 (d, 2H), 7.81 (d, 2H).

$^{13}\text{C}$  NMR (300 MHz,  $\text{C}_6\text{D}_6$ )  $\delta$  (ppm) = 24.6, 65.5, 83.4, 123.5, 126.8, 146.5, 147.2.

$^{11}\text{B}$  NMR (400 MHz,  $\text{C}_6\text{D}_6$ )  $\delta$  (ppm) = 22.5.

**2-((3-nitrobenzyl)oxy)-4,4,5,5-tetramethyl-1,3,2-dioxaborolane (f)**

$^1\text{H}$  NMR (300 MHz,  $\text{C}_6\text{D}_6$ ):  $\delta$  (ppm) = 1.05 (s, 12H), 4.67 (s, 2H), 6.7-7.81 (m, 1H), 7.25(m, 2H), 7.5(m, 1H), 8.1 (m, 2H).

$^{13}\text{C}$  NMR (300 MHz,  $\text{C}_6\text{D}_6$ ):  $\delta$  (ppm) = 24.4, 65.6, 83.3, 121.3, 122.0, 126.7, 129.6, 132.4, 141.2.

$^{11}\text{B}$  NMR (400 MHz,  $\text{C}_6\text{D}_6$ ):  $\delta$  (ppm) = 22.4

**2-((2-nitrobenzyl)oxy)-4,4,5,5-tetramethyl-1,3,2-dioxaborolane (g)**

$^1\text{H}$  NMR (300 MHz,  $\text{C}_6\text{D}_6$ ):  $\delta$  (ppm) = 1.05 (s, 12H), 5.35 (s, 2H), 6.99 (m, 1H), 7.44 (m, 1H), 7.55 – 7.63 (m, 2H).

$^{13}\text{C}$  NMR (300 MHz,  $\text{C}_6\text{D}_6$ ):  $\delta$  (ppm) = 24.5, 63.6, 83.1, 127.0, 128.6, 128.8, 132.4, 133.4, 135.4.

$^{11}\text{B}$  NMR (400 MHz,  $\text{C}_6\text{D}_6$ ):  $\delta$  (ppm) = 22.4

**4,4,5,5-tetramethyl-2-(1-phenylethoxy)-1,3,2-dioxaborolane (h)**

$^1\text{H}$  NMR (300 MHz,  $\text{C}_6\text{D}_6$ )  $\delta$  (ppm) = 1.03 (s, 12H), 1.47-1.49 (m, 3H), 5.79 (s, 1H), 7.00-7.07 (m, 1H), 7.10-7.17 (m, 2H), 7.31-7.34 (m, 2H).

$^{13}\text{C}$  NMR (300 MHz,  $\text{C}_6\text{D}_6$ )  $\delta$  (ppm) = 24.3, 25.4, 72.6, 82.2, 125.3, 127.0, 128.2, 145.0.

$^{11}\text{B}$  NMR (300 MHz,  $\text{C}_6\text{D}_6$ )  $\delta$  (ppm) = 22.6.

**Figure S42. Spin density distribution calculated by the DFT B3LYP/def2tzvp method for paramagnetic germylene 1a.**

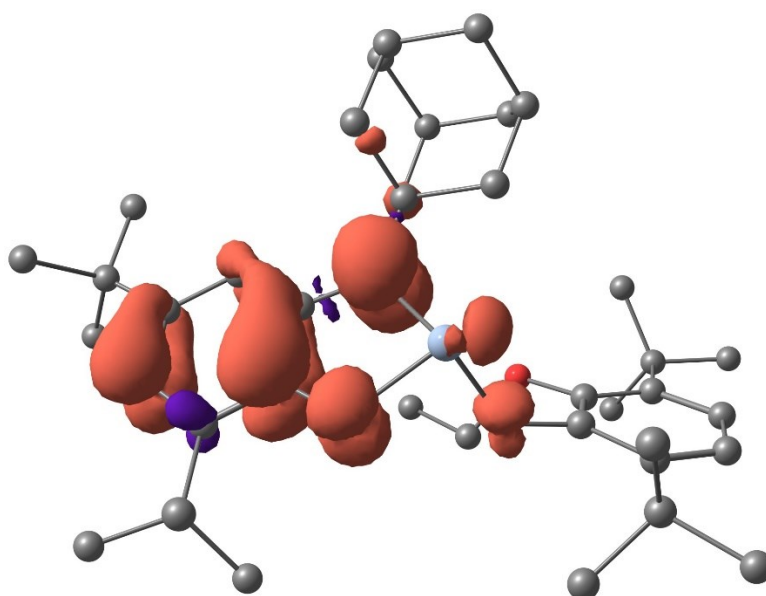

Supplement: d1nj01644j1.pdf [file d1nj01644j1.pdf]
